# Supplementary material
Source: Copernicus journal article supplement (doi:10.5194/egusphere-2026-3084)
Supplement: Supplementary file 1 [file egusphere-2026-3084-supplement.pdf]

# **Identifying biological sources and indicators of surfactants in the sea surface microlayer and subsurface waters using fluorescence and microbial community profiling**

Felix E. Agblemanyo<sup>1</sup>, Daniel Ammer<sup>2</sup>, Amber E. Birt<sup>2</sup>, Malique R. Bowen<sup>1</sup>, Jennifer F. Biddle<sup>1</sup>,  
Amanda A. Frossard<sup>2</sup>, Andrew S. Wozniak<sup>1</sup>

<sup>1</sup>University of Delaware, School of Marine Science and Policy

<sup>2</sup>University of Georgia, Department of Chemistry

*The SI contains 8 supplementary tables (Tables S1 – S8), 1 supplementary figure (Figure S1) and references.*

**Table S1:** Sample time, location, and physicochemical properties for SML and SSW samples discussed in the manuscript.

| Station           | ISO DateTime UTC     | Time of Day | Type | Latitude | Longitude | Salinity (PSU) | Surface Temp (degC) | Chlorophyll-a (ug/L) | Nitrate + Nitrite (uM) | DOC (mg/L) |
|-------------------|----------------------|-------------|------|----------|-----------|----------------|---------------------|----------------------|------------------------|------------|
| Delaware Coast    | 2022-08-24T18:40:00Z | Afternoon   | SML  | 38.76335 | -74.7396  | 32.07          | 24.13               | 0.37                 | 11.66                  | 1.21       |
| Delaware Coast    | 2022-08-24T20:30:00Z | Afternoon   | SSW  | 38.72596 | -74.7575  | 32.12          | 23.74               | 0.32                 | -0.62                  | 1.34       |
| Delaware Coast    | 2022-08-25T00:04:00Z | Evening     | SML  | 38.71129 | -74.7464  | 32.51          | 24.95               | 0.39                 | 1.84                   | 1.72       |
| Delaware Coast    | 2022-08-25T01:47:00Z | Evening     | SSW  | 38.72966 | -74.7297  | 32.51          | 24.87               | 0.38                 | -1.91                  | 2.10       |
| Delaware Coast    | 2022-08-25T06:30:00Z | Night       | SML  | 38.71385 | -74.7737  | 32.42          | 24.49               | 0.38                 | 0.73                   | 1.46       |
| Delaware Coast    | 2022-08-25T09:15:00Z | Night       | SSW  | 38.71822 | -74.7483  | 32.42          | 24.53               | 0.36                 | -1.73                  |            |
| Delaware Coast    | 2022-08-25T17:00:00Z | Afternoon   | SML  | 38.7135  | -74.7619  | 32.52          | 23.30               | 0.38                 | -0.14                  | 1.33       |
| Delaware Coast    | 2022-08-25T18:20:00Z | Afternoon   | SSW  | 38.71481 | -74.7529  | 32.52          | 22.98               | 0.35                 | -0.53                  | 1.28       |
| Delaware Coast    | 2022-08-25T22:37:00Z | Evening     | SML  | 38.71229 | -74.7681  | 32.51          | 25.34               | 0.36                 | 0.68                   | 1.23       |
| Delaware Coast    | 2022-08-25T23:37:00Z | Evening     | SSW  | 38.71471 | -74.7536  | 32.49          | 25.25               | 0.37                 | -1.26                  | 1.18       |
| Delaware Coast    | 2022-08-26T06:30:00Z | Night       | SML  | 38.71139 | -74.7591  | 32.48          | 24.75               | 0.34                 | 1.66                   | 1.43       |
| Delaware Coast    | 2022-08-26T09:20:00Z | Night       | SSW  | 38.72378 | -74.744   | 32.50          | 24.80               | 0.32                 | -1.32                  | 1.19       |
| Continental Slope | 2022-08-30T06:30:00Z | Night       | SML  | 37.8325  | -73.7317  | 32.88          | 26.59               | 0.35                 | -0.53                  | 2.02       |
| Continental Slope | 2022-08-30T09:15:00Z | Night       | SSW  | 37.82713 | -73.7362  | 32.87          | 26.60               | 0.36                 | -0.80                  | 1.23       |
| Continental Slope | 2022-08-30T19:11:00Z | Afternoon   | SSW  | 37.82996 | -73.7353  | 33.60          | 27.37               | 0.37                 | 0.19                   | 1.18       |
| Virginia Coast    | 2022-08-31T09:15:00Z | Night       | SSW  | 37.79982 | -75.4351  | 32.49          | 26.13               | 1.51                 | 0.46                   | 1.51       |
| Virginia Coast    | 2022-08-31T14:00:00Z | Morning     | SML  | 37.82082 | -75.4247  | 32.55          | 23.76               | 3.46                 | -0.06                  | 1.65       |
| Virginia Coast    | 2022-08-31T15:10:00Z | Morning     | SSW  | 37.8214  | -75.4205  | 32.55          | 25.31               | 4.11                 | -1.79                  | 1.35       |
| Continental Slope | 2022-09-01T06:39:00Z | Night       | SML  | 37.83049 | -73.7284  | 33.35          | 26.05               | 0.15                 | 0.51                   | 1.27       |
| Continental Slope | 2022-09-01T09:10:00Z | Night       | SSW  | 37.82215 | -73.7317  | 33.28          | 26.02               | 0.16                 | -0.86                  | 1.07       |
| Continental Slope | 2022-09-01T17:00:00Z | Afternoon   | SML  | 37.83049 | -73.7284  | 33.21          | 26.39               | 0.22                 | 0.45                   | 1.44       |
| Continental Slope | 2022-09-01T18:10:00Z | Afternoon   | SSW  | 37.82662 | -73.7175  | 33.28          | 26.38               | 0.22                 | -1.16                  | 1.14       |
| Continental Slope | 2022-09-01T22:34:00Z | Evening     | SML  | 37.82333 | -73.7192  | 33.18          | 26.31               | 0.19                 | 0.11                   | 1.36       |
| Continental Slope | 2022-09-02T00:21:00Z | Evening     | SSW  | 37.80909 | -73.6985  | 33.16          | 26.16               | 0.21                 | -0.70                  | 1.09       |
| Continental Slope | 2022-09-02T06:34:00Z | Night       | SML  | 37.83185 | -73.7205  | 33.15          | 26.13               | 0.22                 | 1.19                   | 1.03       |
| Continental Slope | 2022-09-02T08:49:00Z | Night       | SSW  | 37.82324 | -73.7274  | 33.08          | 25.99               | 0.23                 | -1.37                  | 1.06       |
| Delaware Coast    | 2022-11-10T14:15:00Z | Morning     | SML  | 38.71299 | -74.7591  | 33.03          | 16.77               | 4.50                 | 2.07                   | 0.82       |

|                   |                          |           |     |          |          |       |       |      |       |      |
|-------------------|--------------------------|-----------|-----|----------|----------|-------|-------|------|-------|------|
| Delaware<br>Coast | 2022-11-<br>10T16:12:00Z | Morning   | SSW | 38.71055 | -74.7499 | 33.03 | 16.96 | 3.62 | -2.49 | 0.98 |
| Delaware<br>Coast | 2022-11-<br>10T18:09:00Z | Afternoon | SML | 38.71264 | -74.7549 | 32.99 | 17.15 | 3.33 | 4.70  | 1.14 |
| Delaware<br>Coast | 2022-11-<br>10T20:02:00Z | Afternoon | SSW | 38.7146  | -74.7494 | 32.96 | 20.72 | 2.60 | -1.58 | 1.04 |
| Delaware<br>Coast | 2022-11-<br>10T23:40:00Z | Evening   | SML | 38.71288 | -74.733  | 32.68 | 21.02 | 2.03 | 15.64 | 1.36 |
| Delaware<br>Coast | 2022-11-<br>11T01:20:00Z | Evening   | SSW | 38.71829 | -74.7516 | 32.91 | 17.33 | 1.97 | -1.94 | 1.14 |
| Delaware<br>Coast | 2022-11-<br>11T06:35:00Z | Night     | SML | 38.71068 | -74.7409 | 33.04 | 17.06 | 1.73 | 0.78  | 1.12 |
| Delaware<br>Coast | 2022-11-<br>11T09:16:00Z | Night     | SSW | 38.71714 | -74.753  | 33.02 | 16.67 | 2.16 | -1.90 | 1.02 |

**Table S2:** OpenFluor match summary of FDOM components identified by PARAFAC analysis

| <b>Component</b> | <b>Identity</b>        | <b>Ex/Em<br/>(nm)</b> | <b>Matched Dataset</b> | <b>Matched<br/>Component</b> | <b>Similarity<br/>TCC ex·em</b> | <b>Reference</b>            |
|------------------|------------------------|-----------------------|------------------------|------------------------------|---------------------------------|-----------------------------|
| C1               | Tryptophan-like        | 276/339               | DOMflour               | C2                           | 0.9864                          | (Lu et al., 2022)           |
|                  |                        |                       | Mihae_Amundsen_ANA08B  | C2                           | 0.9822                          | (Jeon et al., 2021)         |
|                  |                        |                       | GoMaine                | C5                           | 0.9689                          | (Cawley et al., 2012a)      |
| C2               | Marine humic-like      | 250/395               | SharkBay               | C1                           | 0.9854                          | (Cawley et al., 2012b)      |
|                  |                        |                       | Arctic Seawater        | C2                           | 0.9825                          | (Chen et al., 2018)         |
|                  |                        |                       | Gao_AF4                | C1                           | 0.9787                          | (Gao and Guéguen, 2017)     |
| C3               | Terrestrial humic-like | 259/464               | M156 M160              | C1                           | 0.9937                          | (Devresse et al., 2023)     |
|                  |                        |                       | Dainard_Bering2013     | C1                           | 0.9911                          | (Dainard and Guéguen, 2013) |
|                  |                        |                       | JapanSea               | C1                           | 0.9869                          | (Tanaka et al., 2014)       |
| C4               | Tyrosine-like          | 276/309               | LiverpoolBay           | C6                           | 0.967                           | (Yamashita et al., 2011)    |
|                  |                        |                       | PARIX                  | C7                           | 0.9667                          | (Philibert et al., 2022)    |
|                  |                        |                       | Korean porewaters      | C3                           | 0.9549                          | (Chen et al., 2017)         |

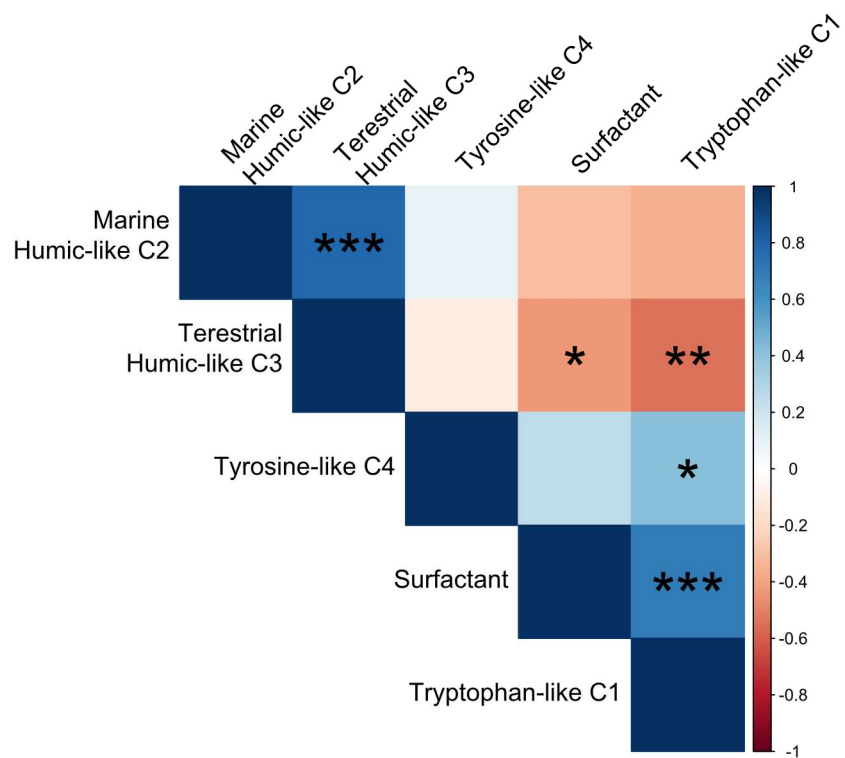

Figure S1: Pearson correlation coefficients (color bar) showing relationships among DOM variables. (\*\*\*) =  $P < 0.001$ , (\*\*) =  $P < 0.01$ , (\*) =  $P < 0.05$ )

**Table S3:** Bacterial lineages significantly associated with either the SML or SSW as determined by indicator species analysis.

| Phylum                     | Genus                        | ASV    | Mean Abundance (%) <sup>*</sup> | Association Strength (r.g) <sup>+</sup> | P value |
|----------------------------|------------------------------|--------|---------------------------------|-----------------------------------------|---------|
| <b>SML Associated Taxa</b> |                              |        |                                 |                                         |         |
| Actinomycetota             | Candidatus_Actinomarina      | ASV010 | 2.509                           | 0.35                                    | 0.015   |
| Pseudomonadota             | SAR86_clade                  | ASV008 | 2.110                           | 0.26                                    | 0.02    |
| Pseudomonadota             | SAR86_clade                  | ASV013 | 2.058                           | 0.30                                    | 0.006   |
| Pseudomonadota             | SAR86_clade                  | ASV014 | 1.379                           | 0.16                                    | 0.046   |
| Pseudomonadota             | Candidatus_Puniceispirillum  | ASV031 | 0.917                           | 0.36                                    | 0.001   |
| Pseudomonadota             | SAR116_clade                 | ASV020 | 0.897                           | 0.21                                    | 0.013   |
| Pseudomonadota             | AEGEAN-169_marine_group      | ASV030 | 0.831                           | 0.28                                    | 0.032   |
| Pseudomonadota             | Paracoccaceae                | ASV026 | 0.745                           | 0.21                                    | 0.047   |
| Pseudomonadota             | AEGEAN-169_marine_group      | ASV040 | 0.744                           | 0.34                                    | 0.013   |
| Pseudomonadota             | SAR86_clade                  | ASV044 | 0.582                           | 0.31                                    | 0.006   |
| Pseudomonadota             | SAR116_clade                 | ASV105 | 0.337                           | 0.31                                    | 0.014   |
| Pseudomonadota             | KI89A_clade                  | ASV063 | 0.289                           | 0.26                                    | 0.015   |
| Pseudomonadota             | SAR116_clade                 | ASV069 | 0.271                           | 0.19                                    | 0.005   |
| Dadabacteria               | CSP1-2_insertae_sedis_family | ASV077 | 0.270                           | 0.32                                    | 0.002   |
| Pseudomonadota             | SAR86_clade                  | ASV070 | 0.200                           | 0.22                                    | 0.014   |
| Pseudomonadota             | Parvibaculaceae              | ASV113 | 0.199                           | 0.22                                    | 0.004   |
| Pseudomonadota             | AEGEAN-169_marine_group      | ASV051 | 0.197                           | 0.22                                    | 0.023   |
| Pseudomonadota             | SAR116_clade                 | ASV126 | 0.184                           | 0.24                                    | 0.031   |
| Pseudomonadota             | Gammaproteobacteria          | ASV200 | 0.112                           | 0.33                                    | 0.005   |
| Pseudomonadota             | AEGEAN-169_marine_group      | ASV139 | 0.101                           | 0.35                                    | 0.001   |
| Bacteroidota               | NS5_marine_group             | ASV340 | 0.073                           | 0.32                                    | 0.014   |
| Pseudomonadota             | Thalassobaculales            | ASV266 | 0.066                           | 0.26                                    | 0.022   |
| Pseudomonadota             | SAR86_clade                  | ASV297 | 0.059                           | 0.27                                    | 0.004   |
| Bacteroidota               | Marinoscillum                | ASV331 | 0.056                           | 0.21                                    | 0.043   |
| Pseudomonadota             | Thalassobaculales            | ASV339 | 0.051                           | 0.20                                    | 0.049   |
| Pseudomonadota             | KI89A_clade                  | ASV415 | 0.040                           | 0.19                                    | 0.041   |
| Pseudomonadota             | SAR116_clade                 | ASV373 | 0.030                           | 0.26                                    | 0.025   |
| Pseudomonadota             | Magnetospiraceae             | ASV523 | 0.029                           | 0.47                                    | 0.008   |
| Pseudomonadota             | AEGEAN-169_marine_group      | ASV604 | 0.020                           | 0.33                                    | 0.016   |
| Pseudomonadota             | OM182_clade                  | ASV591 | 0.020                           | 0.23                                    | 0.048   |
| <b>SSW Associated Taxa</b> |                              |        |                                 |                                         |         |
| Pseudomonadota             | Caulobacter                  | ASV009 | 4.802                           | 0.39                                    | 0.001   |
| Bacteroidota               | NS5_marine_group             | ASV017 | 1.216                           | 0.11                                    | 0.042   |
| Pseudomonadota             | Alteromonas                  | ASV038 | 0.980                           | 0.29                                    | 0.049   |
| Pseudomonadota             | Cupriavidus                  | ASV059 | 0.824                           | 0.44                                    | 0.001   |
| Pseudomonadota             | Comamonadaceae               | ASV079 | 0.473                           | 0.30                                    | 0.01    |

|                 |                      |         |       |      |       |
|-----------------|----------------------|---------|-------|------|-------|
| Bacteroidota    | Mesoflavibacter      | ASV130  | 0.334 | 0.29 | 0.002 |
| Bacteroidota    | Cryomorpaceae        | ASV067  | 0.282 | 0.19 | 0.027 |
| Pseudomonadota  | Thalassospira        | ASV207  | 0.212 | 0.39 | 0.002 |
| Pseudomonadota  | Thalassolituus       | ASV290  | 0.207 | 0.31 | 0.014 |
| Bacteroidota    | Fluviicola           | ASV072  | 0.183 | 0.23 | 0.006 |
| Pseudomonadota  | Aquabacterium        | ASV215  | 0.146 | 0.23 | 0.01  |
| Bacteroidota    | Leeuwenhoekella      | ASV397  | 0.096 | 0.20 | 0.015 |
| Bacteroidota    | Pseudofulvibacter    | ASV180  | 0.076 | 0.17 | 0.028 |
| Bacillota       | Bacillaceae          | ASV458  | 0.067 | 0.20 | 0.04  |
| Actinomycetota  | ML602J-51            | ASV376  | 0.066 | 0.30 | 0.04  |
| Pseudomonadota  | Aliiroseovarius      | ASV472  | 0.061 | 0.29 | 0.007 |
| Pseudomonadota  | Novosphingobium      | ASV499  | 0.057 | 0.34 | 0.003 |
| Pseudomonadota  | Gammaproteobacteria  | ASV076  | 0.052 | 0.30 | 0.01  |
| Pseudomonadota  | Pseudoalteromonas    | ASV551  | 0.048 | 0.29 | 0.012 |
| Bacillota       | Niallia              | ASV554  | 0.046 | 0.27 | 0.008 |
| Pseudomonadota  | Thalassospira        | ASV091  | 0.043 | 0.30 | 0.008 |
| Cyanobacteriota | Synechococcus_CC9902 | ASV521  | 0.042 | 0.24 | 0.014 |
| Pseudomonadota  | Azospira             | ASV571  | 0.040 | 0.31 | 0.006 |
| Pseudomonadota  | Candidatus_Odyssella | ASV564  | 0.039 | 0.30 | 0.012 |
| Pseudomonadota  | Comamonadaceae       | ASV650  | 0.037 | 0.30 | 0.016 |
| Cyanobacteriota | Synechococcus_CC9902 | ASV505  | 0.035 | 0.24 | 0.038 |
| Pseudomonadota  | Cupriavidus          | ASV634  | 0.033 | 0.28 | 0.047 |
| Pseudomonadota  | Vibrio               | ASV367  | 0.030 | 0.30 | 0.035 |
| Cyanobacteriota | Synechococcus_CC9902 | ASV507  | 0.029 | 0.19 | 0.049 |
| Bacteroidota    | NS7_marine_group     | ASV454  | 0.029 | 0.18 | 0.043 |
| Pseudomonadota  | Ponticaulis          | ASV489  | 0.028 | 0.57 | 0.001 |
| Pseudomonadota  | Sphingomonadaceae    | ASV127  | 0.026 | 0.24 | 0.016 |
| Bacteroidota    | Aquibacter           | ASV449  | 0.024 | 0.24 | 0.01  |
| Pseudomonadota  | Sphingobium          | ASV337  | 0.023 | 0.30 | 0.005 |
| Cyanobacteriota | Cyanobiaceae         | ASV633  | 0.023 | 0.17 | 0.018 |
| Pseudomonadota  | Sphingobium          | ASV1016 | 0.022 | 0.28 | 0.014 |
| Bacteroidota    | Flavobacteriaceae    | ASV375  | 0.020 | 0.39 | 0.007 |
| Pseudomonadota  | Marinobacter         | ASV1208 | 0.020 | 0.32 | 0.014 |
| Bacteroidota    | NS9_marine_group     | ASV382  | 0.019 | 0.27 | 0.024 |
| Pseudomonadota  | Zoogloea             | ASV977  | 0.019 | 0.30 | 0.012 |
| Bacteroidota    | Winogradskyella      | ASV741  | 0.019 | 0.33 | 0.005 |
| Bacteroidota    | Fluviicola           | ASV610  | 0.018 | 0.38 | 0.027 |
| Bacteroidota    | Flavobacteriaceae    | ASV626  | 0.017 | 0.16 | 0.031 |
| Bacteroidota    | Fluviicola           | ASV615  | 0.017 | 0.27 | 0.034 |
| Bacillota       | Neobacillus          | ASV802  | 0.017 | 0.28 | 0.005 |
| Pseudomonadota  | Saccharospirillaceae | ASV1171 | 0.017 | 0.46 | 0.001 |

|                   |                         |         |       |      |       |
|-------------------|-------------------------|---------|-------|------|-------|
| Bacteroidota      | Nonlabens               | ASV1119 | 0.017 | 0.24 | 0.019 |
| Planctomycetota   | Mariniblastus           | ASV475  | 0.016 | 0.27 | 0.011 |
| Bacteroidota      | Cyclobacteriaceae       | ASV664  | 0.016 | 0.21 | 0.034 |
| Cyanobacteriota   | Cyanobium_PCC-6307      | ASV613  | 0.016 | 0.40 | 0.006 |
| Bacteroidota      | Muricauda               | ASV807  | 0.015 | 0.35 | 0.007 |
| Pseudomonadota    | Beijerinckiaceae        | ASV775  | 0.015 | 0.27 | 0.045 |
| Bacteroidota      | Saprosiraceae           | ASV1013 | 0.015 | 0.29 | 0.026 |
| Pseudomonadota    | Brevundimonas           | ASV548  | 0.013 | 0.25 | 0.028 |
| Pseudomonadota    | Thalassospira           | ASV287  | 0.013 | 0.43 | 0.002 |
| Pseudomonadota    | Nitrosomonadaceae       | ASV1097 | 0.013 | 0.38 | 0.008 |
| Cyanobacteriota   | Cyanobiaceae            | ASV827  | 0.013 | 0.30 | 0.026 |
| Pseudomonadota    | Alphaproteobacteria     | ASV665  | 0.012 | 0.30 | 0.028 |
| Bacteroidota      | Aureispira              | ASV1139 | 0.012 | 0.22 | 0.009 |
| Cyanobacteriota   | Synechococcus_CC9902    | ASV1055 | 0.012 | 0.27 | 0.02  |
| Campylobacterota  | Arcobacter              | ASV1513 | 0.012 | 0.30 | 0.043 |
| Cyanobacteriota   | Synechococcus_CC9902    | ASV1832 | 0.011 | 0.27 | 0.049 |
| Pseudomonadota    | Pseudomonas             | ASV1392 | 0.011 | 0.26 | 0.033 |
| Pseudomonadota    | Gammaproteobacteria     | ASV643  | 0.011 | 0.32 | 0.025 |
| Bacteroidota      | Crocinitomix            | ASV940  | 0.010 | 0.46 | 0.008 |
| Pseudomonadota    | B2M28                   | ASV908  | 0.010 | 0.31 | 0.043 |
| Cyanobacteriota   | Synechococcus_CC9902    | ASV1180 | 0.010 | 0.33 | 0.006 |
| Bacteroidota      | Cryomorphaeae           | ASV1045 | 0.010 | 0.21 | 0.046 |
| Pseudomonadota    | Paracoccaceae           | ASV1048 | 0.010 | 0.33 | 0.01  |
| Bacteroidota      | Marinoscillum           | ASV1603 | 0.009 | 0.27 | 0.037 |
| Pseudomonadota    | Alphaproteobacteria     | ASV1265 | 0.009 | 0.29 | 0.048 |
| Pseudomonadota    | Haliaceae               | ASV805  | 0.008 | 0.31 | 0.018 |
| Pseudomonadota    | Thalassolituus          | ASV1855 | 0.008 | 0.33 | 0.046 |
| Bacteroidota      | NS9_marine_group        | ASV1168 | 0.007 | 0.26 | 0.043 |
| Bacteroidota      | NS5_marine_group        | ASV353  | 0.007 | 0.26 | 0.047 |
| Pseudomonadota    | Hellea                  | ASV666  | 0.007 | 0.32 | 0.018 |
| Bacteroidota      | Sphingobacteriales      | ASV2254 | 0.006 | 0.35 | 0.026 |
| Cyanobacteriota   | Cyanobiaceae            | ASV1653 | 0.006 | 0.32 | 0.009 |
| Bacteroidota      | NS9_marine_group        | ASV1209 | 0.006 | 0.33 | 0.033 |
| Bacteroidota      | NS9_marine_group        | ASV970  | 0.006 | 0.25 | 0.032 |
| Pseudomonadota    | Filomicrobium           | ASV1263 | 0.006 | 0.41 | 0.007 |
| Verrucomicrobiota | Rubritalea              | ASV2649 | 0.005 | 0.29 | 0.048 |
| Actinomycetota    | Candidatus_Actinomarina | ASV2086 | 0.005 | 0.33 | 0.014 |
| Pseudomonadota    | Methylobacterium        | ASV391  | 0.005 | 0.33 | 0.022 |
| Pseudomonadota    | Sphingomonas            | ASV2242 | 0.005 | 0.32 | 0.032 |
| Bdellovibrionota  | OM27_clade              | ASV1111 | 0.005 | 0.28 | 0.045 |
| Pseudomonadota    | Kordiimonas             | ASV3126 | 0.005 | 0.33 | 0.029 |

|                              |                                              |         |       |      |       |
|------------------------------|----------------------------------------------|---------|-------|------|-------|
| Bacteroidota                 | NS5_marine_group                             | ASV1629 | 0.005 | 0.31 | 0.013 |
| SAR324_clade(Marine_group_B) | SAR324_clade_insertae_sedis                  | ASV2310 | 0.005 | 0.31 | 0.017 |
| Bacteria_unclassified        | Bacteria                                     | ASV1749 | 0.005 | 0.24 | 0.032 |
| Pseudomonadota               | Spongiibacteraceae                           | ASV1136 | 0.004 | 0.34 | 0.036 |
| Actinomycetota               | Sva0996_marine_group                         | ASV1669 | 0.004 | 0.35 | 0.024 |
| Bacteria_unclassified        | Bacteria                                     | ASV2129 | 0.004 | 0.32 | 0.041 |
| Cyanobacteriota              | Atelocyanobacterium_(UCYN-A)                 | ASV1496 | 0.004 | 0.30 | 0.025 |
| Bacteroidota                 | Crocinitomix                                 | ASV2618 | 0.004 | 0.37 | 0.007 |
| Pseudomonadota               | Candidatus_Hepatincola_insertae_sedis_family | ASV1734 | 0.004 | 0.35 | 0.011 |
| Pseudomonadota               | Seongchinamella                              | ASV1232 | 0.004 | 0.34 | 0.04  |
| Bacteroidota                 | Roseivirga                                   | ASV1895 | 0.004 | 0.38 | 0.014 |
| Pseudomonadota               | Alcanivorax                                  | ASV159  | 0.003 | 0.36 | 0.02  |
| Bdellovibrionota             | OM27_clade                                   | ASV1403 | 0.003 | 0.26 | 0.048 |
| Bacteroidota                 | NS9_marine_group                             | ASV2083 | 0.003 | 0.34 | 0.006 |
| Thermodesulfobacteriota      | PB19                                         | ASV5289 | 0.003 | 0.29 | 0.042 |
| Pseudomonadota               | SAR86_clade                                  | ASV3099 | 0.003 | 0.29 | 0.043 |
| Pseudomonadota               | Alphaproteobacteria                          | ASV1651 | 0.002 | 0.31 | 0.037 |
| Cyanobacteriota              | Synechococcus_CC9902                         | ASV5683 | 0.002 | 0.28 | 0.039 |
| Planctomycetota              | Pirellulaceae                                | ASV7113 | 0.002 | 0.27 | 0.043 |
| Cyanobacteriota              | Cyanobiaceae                                 | ASV4206 | 0.002 | 0.25 | 0.047 |

\*Mean relative abundance (%) of each ASV calculated within its associated sample type (SML or SSW).

†Group-equalized point-biserial correlation coefficient (r.g) showing association strength between each ASV and sample type.

**Table S4:** Protist lineages significantly associated with either the SML or SSW as determined by indicator species analysis.

| Division                   | Genus                    | ASV     | Mean Abundance (%) <sup>*</sup> | Association Strength (r.g) <sup>+</sup> | P value |
|----------------------------|--------------------------|---------|---------------------------------|-----------------------------------------|---------|
| <b>SML Associated Taxa</b> |                          |         |                                 |                                         |         |
| Chlorophyta                | Ostreococcus             | ASV001  | 20.533                          | 0.257                                   | 0.011   |
| Chlorophyta                | Ostreococcus             | ASV034  | 2.824                           | 0.303                                   | 0.023   |
| Alveolata                  | Dino-Group-II-Clade-1_X  | ASV183  | 0.914                           | 0.348                                   | 0.017   |
| Rhizaria                   | Cryomonadida_XX          | ASV488  | 0.554                           | 0.266                                   | 0.028   |
| Stramenopiles              | Phytophthora             | ASV1099 | 0.220                           | 0.303                                   | 0.009   |
| Alveolata                  | Dino-Group-II            | ASV1402 | 0.185                           | 0.303                                   | 0.039   |
| Alveolata                  | Dino-Group-V_XX          | ASV184  | 0.162                           | 0.356                                   | 0.005   |
| Alveolata                  | Dino-Group-II-Clade-22_X | ASV850  | 0.144                           | 0.310                                   | 0.040   |
| Alveolata                  | Prorocentrum             | ASV231  | 0.087                           | 0.343                                   | 0.005   |
| Alveolata                  | Dino-Group-II-Clade-12_X | ASV1232 | 0.083                           | 0.355                                   | 0.015   |
| Alveolata                  | Dino-Group-II-Clade-1_X  | ASV200  | 0.074                           | 0.271                                   | 0.035   |
| Stramenopiles              | MOCH-4_XXX               | ASV760  | 0.073                           | 0.291                                   | 0.007   |
| Alveolata                  | Dino-Group-III_XX        | ASV324  | 0.067                           | 0.308                                   | 0.006   |
| Chlorophyta                | Microthamniales_X        | ASV2889 | 0.060                           | 0.289                                   | 0.028   |
| Alveolata                  | Gyrodinium               | ASV671  | 0.059                           | 0.353                                   | 0.020   |
| Alveolata                  | Dinophyceae              | ASV294  | 0.056                           | 0.331                                   | 0.007   |
| Alveolata                  | Dino-Group-II-Clade-1_X  | ASV306  | 0.055                           | 0.337                                   | 0.003   |
| Alveolata                  | Dino-Group-II-Clade-12_X | ASV399  | 0.054                           | 0.256                                   | 0.043   |
| Alveolata                  | Dino-Group-II-Clade-3_X  | ASV825  | 0.053                           | 0.322                                   | 0.015   |
| Alveolata                  | Dino-Group-II            | ASV841  | 0.043                           | 0.391                                   | 0.006   |
| Stramenopiles              | MOCH-2_XXX               | ASV1906 | 0.031                           | 0.365                                   | 0.013   |
| Chlorophyta                | Pterosperma              | ASV669  | 0.026                           | 0.375                                   | 0.009   |
| Alveolata                  | Dinophyceae              | ASV511  | 0.023                           | 0.360                                   | 0.009   |
| <b>SSW Associated Taxa</b> |                          |         |                                 |                                         |         |
| Alveolata                  | Gyrodinium               | ASV003  | 8.716                           | 0.265                                   | 0.037   |
| Alveolata                  | Gyrodinium               | ASV021  | 2.616                           | 0.425                                   | 0.003   |
| Alveolata                  | Strombidiidae_X          | ASV162  | 1.157                           | 0.411                                   | 0.001   |
| Alveolata                  | Laboea                   | ASV043  | 0.647                           | 0.376                                   | 0.001   |
| Alveolata                  | Gonyaulax                | ASV197  | 0.511                           | 0.316                                   | 0.029   |
| Alveolata                  | Gyrodinium               | ASV046  | 0.495                           | 0.379                                   | 0.016   |
| Alveolata                  | Strombidiidae_X          | ASV073  | 0.309                           | 0.357                                   | 0.039   |
| Alveolata                  | Strombidiidae_X          | ASV247  | 0.254                           | 0.447                                   | 0.002   |
| Alveolata                  | Spirotrichea             | ASV265  | 0.251                           | 0.413                                   | 0.010   |
| Alveolata                  | Oligotrichida_XX         | ASV373  | 0.211                           | 0.431                                   | 0.003   |
| Alveolata                  | Pelagodinium             | ASV120  | 0.210                           | 0.331                                   | 0.027   |
| Alveolata                  | Dino-Group-II-Clade-5_X  | ASV093  | 0.201                           | 0.224                                   | 0.034   |

|           |                                 |        |       |       |       |
|-----------|---------------------------------|--------|-------|-------|-------|
| Alveolata | Dinophyceae                     | ASV030 | 0.164 | 0.318 | 0.039 |
| Alveolata | Strombidiidae_X                 | ASV300 | 0.162 | 0.359 | 0.008 |
| Alveolata | Strombidiidae                   | ASV302 | 0.120 | 0.371 | 0.023 |
| Alveolata | Dino-Group-II-Clade-23_X        | ASV643 | 0.117 | 0.353 | 0.032 |
| Alveolata | Pseudotonia                     | ASV147 | 0.115 | 0.331 | 0.021 |
| Alveolata | Dino-Group-II-Clade-5_X         | ASV477 | 0.106 | 0.277 | 0.033 |
| Alveolata | Spirotrichea                    | ASV475 | 0.106 | 0.355 | 0.040 |
| Alveolata | Dinophyceae                     | ASV346 | 0.096 | 0.343 | 0.005 |
| Alveolata | Dino-Group-II-Clade-10-and-11_X | ASV524 | 0.062 | 0.365 | 0.034 |

\*Mean relative abundance (%) of each ASV calculated within its associated sample type (SML or SSW).

+Group-equalized point-biserial correlation coefficient (r.g) indicating the strength of association between each ASV and sample type.

**Table S5:** Top 30 most abundant bacterial lineages significantly associated with each sampling station as determined by indicator species analysis.

| Phylum                       | Genus                        | ASV    | Mean Abundance (%)* | Association Strength (r.g) <sup>+</sup> | P value | Stations          |
|------------------------------|------------------------------|--------|---------------------|-----------------------------------------|---------|-------------------|
| Cyanobacteriota              | Prochlorococcus_MIT9313      | ASV003 | 3.177               | 0.949                                   | 0.001   | Continental Slope |
| Cyanobacteriota              | Cyanobium_PCC-6307           | ASV006 | 2.846               | 0.805                                   | 0.001   | Continental Slope |
| SAR324_clade(Marine_group_B) | SAR324_clade_insertae_sedis  | ASV024 | 0.856               | 0.789                                   | 0.001   | Continental Slope |
| Pseudomonadota               | Paracoccaceae                | ASV032 | 0.483               | 0.897                                   | 0.001   | Continental Slope |
| Pseudomonadota               | SAR116_clade                 | ASV042 | 0.402               | 0.913                                   | 0.001   | Continental Slope |
| Cyanobacteriota              | Synechococcus_CC9902         | ASV016 | 0.379               | 0.867                                   | 0.001   | Continental Slope |
| Pseudomonadota               | Clade_Ib                     | ASV007 | 0.345               | 0.760                                   | 0.001   | Continental Slope |
| Pseudomonadota               | SAR116_clade                 | ASV036 | 0.261               | 0.770                                   | 0.001   | Continental Slope |
| Pseudomonadota               | SAR86_clade                  | ASV043 | 0.251               | 0.898                                   | 0.001   | Continental Slope |
| Pseudomonadota               | KI89A_clade                  | ASV063 | 0.227               | 0.721                                   | 0.001   | Continental Slope |
| Pseudomonadota               | SAR116_clade                 | ASV069 | 0.213               | 0.897                                   | 0.001   | Continental Slope |
| Pseudomonadota               | Clade_III                    | ASV094 | 0.198               | 0.798                                   | 0.001   | Continental Slope |
| Dadabacteria                 | CSP1-2_insertae_sedis_family | ASV077 | 0.194               | 0.769                                   | 0.001   | Continental Slope |
| Bacteroidota                 | NS5_marine_group             | ASV050 | 0.158               | 0.777                                   | 0.001   | Continental Slope |
| Pseudomonadota               | AEGEAN-169_marine_group      | ASV051 | 0.152               | 0.821                                   | 0.001   | Continental Slope |
| Pseudomonadota               | Parvibaculaceae              | ASV113 | 0.150               | 0.870                                   | 0.001   | Continental Slope |
| Pseudomonadota               | SAR86_clade                  | ASV070 | 0.149               | 0.853                                   | 0.001   | Continental Slope |
| Pseudomonadota               | MWH-UniP1_aquatic_group      | ASV078 | 0.135               | 0.676                                   | 0.001   | Continental Slope |
| Pseudomonadota               | SAR116_clade                 | ASV151 | 0.131               | 0.640                                   | 0.002   | Continental Slope |
| Pseudomonadota               | OM60(NOR5)_clade             | ASV144 | 0.117               | 0.808                                   | 0.001   | Continental Slope |
| Planctomycetota              | OM190                        | ASV218 | 0.111               | 0.850                                   | 0.001   | Continental Slope |
| Pseudomonadota               | Pseudohongiella              | ASV132 | 0.103               | 0.796                                   | 0.001   | Continental Slope |
| Pseudomonadota               | S25-593                      | ASV135 | 0.095               | 0.818                                   | 0.001   | Continental Slope |
| Verrucomicrobiota            | DEV007                       | ASV161 | 0.094               | 0.790                                   | 0.001   | Continental Slope |
| Cyanobacteriota              | Cyanobiaceae                 | ASV087 | 0.093               | 0.631                                   | 0.005   | Continental Slope |
| Cyanobacteriota              | Cyanobiaceae                 | ASV096 | 0.080               | 0.596                                   | 0.007   | Continental Slope |
| Cyanobacteriota              | Prochlorococcus_MIT9313      | ASV173 | 0.076               | 0.901                                   | 0.001   | Continental Slope |

|                   |                             |        |        |       |       |                     |
|-------------------|-----------------------------|--------|--------|-------|-------|---------------------|
| Pseudomonadota    | Asciidiaceihabitans         | ASV217 | 0.071  | 0.779 | 0.001 | Continental Slope   |
| Pseudomonadota    | SAR86_clade                 | ASV157 | 0.067  | 0.770 | 0.001 | Continental Slope   |
| Verrucomicrobiota | MB11C04_marine_group        | ASV190 | 0.067  | 0.913 | 0.001 | Continental Slope   |
| Pseudomonadota    | Clade_Ia                    | ASV002 | 10.159 | 0.798 | 0.001 | Delaware Coast Fall |
| Pseudomonadota    | SAR86_clade                 | ASV008 | 1.778  | 0.712 | 0.001 | Delaware Coast Fall |
| Actinomycetota    | Candidatus_Actinomarina     | ASV011 | 1.421  | 0.931 | 0.001 | Delaware Coast Fall |
| Pseudomonadota    | SAR86_clade                 | ASV014 | 1.191  | 0.886 | 0.001 | Delaware Coast Fall |
| Bacteroidota      | NS5_marine_group            | ASV017 | 1.048  | 0.883 | 0.001 | Delaware Coast Fall |
| Bacteroidota      | NS5_marine_group            | ASV025 | 0.671  | 0.995 | 0.001 | Delaware Coast Fall |
| Pseudomonadota    | Candidatus_Puniceispirillum | ASV037 | 0.347  | 0.840 | 0.001 | Delaware Coast Fall |
| Pseudomonadota    | SAR86_clade                 | ASV048 | 0.280  | 0.923 | 0.001 | Delaware Coast Fall |
| Pseudomonadota    | SUP05_cluster               | ASV058 | 0.252  | 0.942 | 0.001 | Delaware Coast Fall |
| Cyanobacteriota   | Synechococcus_CC9902        | ASV015 | 0.248  | 0.821 | 0.001 | Delaware Coast Fall |
| Pseudomonadota    | Ectothiorhodospiraceae      | ASV055 | 0.237  | 0.683 | 0.001 | Delaware Coast Fall |
| Planctomycetota   | Pirellulaceae               | ASV073 | 0.193  | 0.527 | 0.008 | Delaware Coast Fall |
| Bacteroidota      | NS5_marine_group            | ASV081 | 0.187  | 0.950 | 0.001 | Delaware Coast Fall |
| Pseudomonadota    | OM43_clade                  | ASV088 | 0.186  | 0.827 | 0.001 | Delaware Coast Fall |
| Bacteroidota      | Fluviicola                  | ASV072 | 0.138  | 0.860 | 0.001 | Delaware Coast Fall |
| Pseudomonadota    | Amylibacter                 | ASV082 | 0.117  | 0.775 | 0.001 | Delaware Coast Fall |
| Pseudomonadota    | Thalassolituus              | ASV290 | 0.106  | 0.551 | 0.012 | Delaware Coast Fall |
| Pseudomonadota    | Pseudohongiella             | ASV146 | 0.106  | 0.979 | 0.001 | Delaware Coast Fall |
| Pseudomonadota    | Ectothiorhodospiraceae      | ASV198 | 0.104  | 0.981 | 0.001 | Delaware Coast Fall |
| Pseudomonadota    | Luminiphilus                | ASV117 | 0.093  | 0.648 | 0.001 | Delaware Coast Fall |
| Actinomycetota    | Candidatus_Actinomarina     | ASV175 | 0.092  | 0.802 | 0.001 | Delaware Coast Fall |
| Bacteroidota      | NS7_marine_group            | ASV208 | 0.087  | 0.883 | 0.001 | Delaware Coast Fall |
| Pseudomonadota    | AEGEAN-169_marine_group     | ASV139 | 0.078  | 0.746 | 0.001 | Delaware Coast Fall |
| Pseudomonadota    | AEGEAN-169_marine_group     | ASV100 | 0.077  | 0.689 | 0.001 | Delaware Coast Fall |
| Bacteroidota      | NS9_marine_group            | ASV166 | 0.075  | 0.964 | 0.001 | Delaware Coast Fall |
| Bacteroidota      | NS9_marine_group            | ASV203 | 0.073  | 0.861 | 0.001 | Delaware Coast Fall |
| Balneolota        | Balneola                    | ASV124 | 0.071  | 0.478 | 0.034 | Delaware Coast Fall |

|                   |                      |        |       |       |       |                          |
|-------------------|----------------------|--------|-------|-------|-------|--------------------------|
| Bacteroidota      | Cryomorphaceae       | ASV153 | 0.069 | 0.848 | 0.001 | Delaware<br>Coast Fall   |
| Pseudomonadota    | OM60(NOR5)_clade     | ASV179 | 0.068 | 0.959 | 0.001 | Delaware<br>Coast Fall   |
| Pseudomonadota    | Porticoccus          | ASV224 | 0.065 | 0.932 | 0.001 | Delaware<br>Coast Fall   |
| Pseudomonadota    | Comamonadaceae       | ASV079 | 0.244 | 0.423 | 0.039 | Delaware<br>Coast Summer |
| Verrucomicrobiota | Roseibacillus        | ASV085 | 0.237 | 0.802 | 0.001 | Delaware<br>Coast Summer |
| Pseudomonadota    | Clade_III            | ASV071 | 0.236 | 0.776 | 0.001 | Delaware<br>Coast Summer |
| Pseudomonadota    | SAR116_clade         | ASV105 | 0.215 | 0.621 | 0.003 | Delaware<br>Coast Summer |
| Pseudomonadota    | OM60(NOR5)_clade     | ASV107 | 0.183 | 0.680 | 0.001 | Delaware<br>Coast Summer |
| Pseudomonadota    | Litorivicinus        | ASV099 | 0.173 | 0.700 | 0.001 | Delaware<br>Coast Summer |
| Pseudomonadota    | SAR92_clade          | ASV152 | 0.150 | 0.460 | 0.032 | Delaware<br>Coast Summer |
| Bacteroidota      | NS5_marine_group     | ASV123 | 0.147 | 0.763 | 0.001 | Delaware<br>Coast Summer |
| Bacteroidota      | NS5_marine_group     | ASV150 | 0.147 | 0.550 | 0.015 | Delaware<br>Coast Summer |
| Bacteroidota      | NS4_marine_group     | ASV086 | 0.132 | 0.664 | 0.003 | Delaware<br>Coast Summer |
| Planctomycetota   | Mariniblastus        | ASV118 | 0.127 | 0.698 | 0.001 | Delaware<br>Coast Summer |
| Bacteroidota      | NS5_marine_group     | ASV133 | 0.122 | 0.876 | 0.001 | Delaware<br>Coast Summer |
| Pseudomonadota    | Clade_III            | ASV147 | 0.106 | 0.678 | 0.002 | Delaware<br>Coast Summer |
| Bacillota         | Acholeplasma         | ASV206 | 0.078 | 0.807 | 0.001 | Delaware<br>Coast Summer |
| Bacteroidota      | NS5_marine_group     | ASV324 | 0.067 | 0.701 | 0.002 | Delaware<br>Coast Summer |
| Cyanobacteriota   | Cyanobiaceae         | ASV216 | 0.061 | 0.739 | 0.001 | Delaware<br>Coast Summer |
| Pseudomonadota    | OM60(NOR5)_clade     | ASV332 | 0.060 | 0.758 | 0.002 | Delaware<br>Coast Summer |
| Cyanobacteriota   | Synechococcus_CC9902 | ASV283 | 0.056 | 0.708 | 0.001 | Delaware<br>Coast Summer |
| Pseudomonadota    | PS1_clade            | ASV374 | 0.040 | 0.773 | 0.001 | Delaware<br>Coast Summer |
| Bacteroidota      | NS9_marine_group     | ASV423 | 0.032 | 0.708 | 0.001 | Delaware<br>Coast Summer |
| Bacteroidota      | NS5_marine_group     | ASV413 | 0.031 | 0.705 | 0.003 | Delaware<br>Coast Summer |
| Pseudomonadota    | Novosphingobium      | ASV499 | 0.030 | 0.469 | 0.021 | Delaware<br>Coast Summer |
| Pseudomonadota    | Vibrionaceae         | ASV461 | 0.029 | 0.531 | 0.008 | Delaware<br>Coast Summer |
| Pseudomonadota    | Pseudoalteromonas    | ASV551 | 0.026 | 0.498 | 0.014 | Delaware<br>Coast Summer |
| Pseudomonadota    | SAR116_clade         | ASV387 | 0.026 | 0.728 | 0.001 | Delaware<br>Coast Summer |
| Bacteroidota      | NS4_marine_group     | ASV425 | 0.023 | 0.649 | 0.001 | Delaware<br>Coast Summer |
| Bacteroidota      | Fluviicola           | ASV480 | 0.022 | 0.789 | 0.001 | Delaware<br>Coast Summer |

|                               |                               |        |       |       |       |                          |
|-------------------------------|-------------------------------|--------|-------|-------|-------|--------------------------|
| Pseudomonadota                | Azospira                      | ASV571 | 0.021 | 0.456 | 0.036 | Delaware<br>Coast Summer |
| Verrucomicrobiota             | Roseibacillus                 | ASV427 | 0.020 | 0.548 | 0.006 | Delaware<br>Coast Summer |
| Pseudomonadota                | Candidatus_Puniceispirillum   | ASV594 | 0.020 | 0.676 | 0.002 | Delaware<br>Coast Summer |
| Cyanobacteriota               | Cyanobium_PCC-6307            | ASV019 | 1.081 | 0.891 | 0.001 | Virginia<br>Coast        |
| Pseudomonadota                | HIMB11                        | ASV023 | 0.898 | 0.862 | 0.001 | Virginia<br>Coast        |
| Actinomycetota                | PeM15                         | ASV068 | 0.426 | 0.535 | 0.025 | Virginia<br>Coast        |
| Cyanobacteriota               | Synechococcus_CC9902          | ASV056 | 0.418 | 0.763 | 0.001 | Virginia<br>Coast        |
| Actinomycetota                | Microbacteriaceae             | ASV092 | 0.287 | 0.698 | 0.004 | Virginia<br>Coast        |
| Cyanobacteriota               | Synechococcus_CC9902          | ASV074 | 0.272 | 0.817 | 0.001 | Virginia<br>Coast        |
| Bacteroidota                  | Mesoflavibacter               | ASV130 | 0.172 | 0.480 | 0.034 | Virginia<br>Coast        |
| Cyanobacteriota               | Cyanobium_PCC-6307            | ASV164 | 0.150 | 0.937 | 0.001 | Virginia<br>Coast        |
| Bacteroidota                  | Formosa                       | ASV075 | 0.135 | 0.834 | 0.001 | Virginia<br>Coast        |
| Cyanobacteriota               | Cyanobium_PCC-6307            | ASV176 | 0.134 | 0.934 | 0.001 | Virginia<br>Coast        |
| Actinomycetota                | Sva0996_marine_group          | ASV285 | 0.091 | 0.748 | 0.001 | Virginia<br>Coast        |
| Pseudomonadota                | AEGEAN-169_marine_group       | ASV231 | 0.086 | 0.881 | 0.001 | Virginia<br>Coast        |
| Bacteroidota                  | NS9_marine_group              | ASV160 | 0.081 | 0.721 | 0.001 | Virginia<br>Coast        |
| Actinomycetota                | Ilumatobacteraceae            | ASV299 | 0.080 | 0.712 | 0.001 | Virginia<br>Coast        |
| Bacteroidota                  | Cryomorphaceae                | ASV174 | 0.076 | 0.827 | 0.001 | Virginia<br>Coast        |
| Marinimicrobia_(SAR406_clade) | Marinimicrobia_(SAR406_clade) | ASV223 | 0.076 | 0.951 | 0.001 | Virginia<br>Coast        |
| Pseudomonadota                | OM60(NOR5)_clade              | ASV298 | 0.070 | 0.704 | 0.001 | Virginia<br>Coast        |
| Actinomycetota                | Gaiellales                    | ASV369 | 0.053 | 0.580 | 0.014 | Virginia<br>Coast        |
| Actinomycetota                | Candidatus_Aquiluna           | ASV336 | 0.052 | 0.849 | 0.001 | Virginia<br>Coast        |
| Pseudomonadota                | Alphaproteobacteria           | ASV322 | 0.050 | 0.867 | 0.001 | Virginia<br>Coast        |
| Planctomycetota               | Mariniblastus                 | ASV366 | 0.048 | 0.628 | 0.009 | Virginia<br>Coast        |
| Planctomycetota               | Rubripirellula                | ASV394 | 0.044 | 0.554 | 0.009 | Virginia<br>Coast        |
| Bacteroidota                  | NS5_marine_group              | ASV393 | 0.042 | 0.982 | 0.001 | Virginia<br>Coast        |
| Pseudomonadota                | Haliaceae                     | ASV482 | 0.039 | 0.798 | 0.001 | Virginia<br>Coast        |
| Planctomycetota               | Pirellulaceae                 | ASV484 | 0.035 | 0.675 | 0.001 | Virginia<br>Coast        |
| Actinomycetota                | Actinobacteria                | ASV512 | 0.028 | 0.674 | 0.001 | Virginia<br>Coast        |
| Bacteroidota                  | Flavobacteriaceae             | ASV421 | 0.027 | 0.864 | 0.001 | Virginia<br>Coast        |

|                 |                      |        |       |       |       |                |
|-----------------|----------------------|--------|-------|-------|-------|----------------|
| Pseudomonadota  | Vibrio               | ASV363 | 0.027 | 0.697 | 0.010 | Virginia Coast |
| Cyanobacteriota | Synechococcus_CC9902 | ASV521 | 0.026 | 0.872 | 0.001 | Virginia Coast |
| Pseudomonadota  | Halieaceae           | ASV559 | 0.024 | 0.577 | 0.014 | Virginia Coast |

\*Mean relative abundance (%) of each ASV calculated across all samples.

+Group-equalized point-biserial correlation coefficient (r.g) indicating the strength of association between each ASV and sample stations.

**Table S6:** Top 30 most abundant protist lineages significantly associated with each sampling station as determined by indicator species analysis.

| Division    | Genus                           | ASV    | Mean Abundance (%) <sup>*</sup> | Association Strength (r.g) <sup>+</sup> | P value | Stations          |
|-------------|---------------------------------|--------|---------------------------------|-----------------------------------------|---------|-------------------|
| Alveolata   | Dino-Group-II-Clade-6_X         | ASV012 | 3.036                           | 0.889                                   | 0.001   | Continental Slope |
| Alveolata   | Dino-Group-I-Clade-5_X          | ASV025 | 2.699                           | 0.969                                   | 0.001   | Continental Slope |
| Alveolata   | Dino-Group-I-Clade-1_X          | ASV032 | 1.032                           | 0.810                                   | 0.002   | Continental Slope |
| Chlorophyta | Chloropicon                     | ASV045 | 0.821                           | 0.908                                   | 0.001   | Continental Slope |
| Alveolata   | Dino-Group-II-Clade-6_X         | ASV039 | 0.814                           | 0.867                                   | 0.001   | Continental Slope |
| Alveolata   | Strombidiidae_X                 | ASV162 | 0.596                           | 0.526                                   | 0.020   | Continental Slope |
| Alveolata   | Dino-Group-II-Clade-10-and-11_X | ASV058 | 0.574                           | 0.835                                   | 0.001   | Continental Slope |
| Alveolata   | Dino-Group-I-Clade-1_X          | ASV056 | 0.556                           | 0.537                                   | 0.026   | Continental Slope |
| Alveolata   | Dinophyceae                     | ASV064 | 0.554                           | 0.648                                   | 0.006   | Continental Slope |
| Chlorophyta | Prasino-Clade-9_XXX             | ASV136 | 0.530                           | 0.858                                   | 0.003   | Continental Slope |
| Alveolata   | Dino-Group-II-Clade-3_X         | ASV131 | 0.509                           | 0.799                                   | 0.001   | Continental Slope |
| Alveolata   | Dino-Group-I-Clade-1_X          | ASV072 | 0.482                           | 0.747                                   | 0.002   | Continental Slope |
| Alveolata   | Dino-Group-I-Clade-5_X          | ASV067 | 0.463                           | 0.834                                   | 0.001   | Continental Slope |
| Alveolata   | Dino-Group-I-Clade-1_X          | ASV050 | 0.397                           | 0.764                                   | 0.002   | Continental Slope |
| Alveolata   | Dino-Group-I-Clade-5_X          | ASV157 | 0.344                           | 0.572                                   | 0.019   | Continental Slope |
| Alveolata   | Dino-Group-III_XX               | ASV100 | 0.343                           | 0.804                                   | 0.002   | Continental Slope |
| Alveolata   | Dino-Group-I-Clade-5_X          | ASV180 | 0.318                           | 0.578                                   | 0.021   | Continental Slope |
| Alveolata   | Dino-Group-II-Clade-17_X        | ASV140 | 0.305                           | 0.885                                   | 0.001   | Continental Slope |
| Alveolata   | Dino-Group-II-Clade-10-and-11_X | ASV066 | 0.266                           | 0.633                                   | 0.009   | Continental Slope |
| Alveolata   | Euduboscquella                  | ASV353 | 0.254                           | 0.718                                   | 0.003   | Continental Slope |
| Alveolata   | Dino-Group-I-Clade-5_X          | ASV173 | 0.250                           | 0.644                                   | 0.006   | Continental Slope |
| Alveolata   | Dino-Group-III_XX               | ASV047 | 0.237                           | 0.733                                   | 0.001   | Continental Slope |
| Alveolata   | Dino-Group-II-Clade-13_X        | ASV218 | 0.221                           | 0.693                                   | 0.001   | Continental Slope |
| Alveolata   | Dino-Group-II-Clade-16_X        | ASV075 | 0.219                           | 0.525                                   | 0.020   | Continental Slope |
| Alveolata   | Dino-Group-II-Clade-8_X         | ASV226 | 0.197                           | 0.744                                   | 0.004   | Continental Slope |
| Alveolata   | Dino-Group-II-Clade-13_X        | ASV251 | 0.176                           | 0.498                                   | 0.037   | Continental Slope |
| Alveolata   | Dino-Group-II-Clade-20_X        | ASV181 | 0.163                           | 0.511                                   | 0.024   | Continental Slope |

|               |                                 |        |        |       |       |                     |
|---------------|---------------------------------|--------|--------|-------|-------|---------------------|
| Stramenopiles | MAST-1D                         | ASV152 | 0.161  | 0.492 | 0.033 | Continental Slope   |
| Alveolata     | Dino-Group-II-Clade-10-and-11_X | ASV219 | 0.152  | 0.574 | 0.029 | Continental Slope   |
| Alveolata     | Dino-Group-I-Clade-5_X          | ASV342 | 0.149  | 0.579 | 0.021 | Continental Slope   |
| Chlorophyta   | Ostreococcus                    | ASV001 | 16.699 | 0.769 | 0.001 | Delaware Coast Fall |
| Alveolata     | Dinophyceae                     | ASV011 | 0.907  | 0.970 | 0.001 | Delaware Coast Fall |
| Rhizaria      | Acanthometra                    | ASV018 | 0.778  | 0.882 | 0.001 | Delaware Coast Fall |
| Stramenopiles | Minidiscus                      | ASV017 | 0.596  | 0.976 | 0.001 | Delaware Coast Fall |
| Picozoa       | Picomonas                       | ASV027 | 0.590  | 0.924 | 0.001 | Delaware Coast Fall |
| Cryptophyta   | Plagioselmis                    | ASV016 | 0.503  | 0.664 | 0.008 | Delaware Coast Fall |
| Chlorophyta   | Micromonas                      | ASV023 | 0.472  | 0.928 | 0.001 | Delaware Coast Fall |
| Chlorophyta   | Bathycoccus                     | ASV008 | 0.460  | 0.784 | 0.002 | Delaware Coast Fall |
| Alveolata     | Dino-Group-II-Clade-14_X        | ASV038 | 0.284  | 0.966 | 0.001 | Delaware Coast Fall |
| Stramenopiles | Pelagomonadales_clade_B1        | ASV041 | 0.277  | 0.852 | 0.001 | Delaware Coast Fall |
| Alveolata     | Prorocentrum                    | ASV029 | 0.274  | 0.882 | 0.001 | Delaware Coast Fall |
| Stramenopiles | Aureococcus                     | ASV042 | 0.253  | 0.904 | 0.001 | Delaware Coast Fall |
| Alveolata     | Dinophyceae                     | ASV080 | 0.240  | 0.562 | 0.023 | Delaware Coast Fall |
| Chlorophyta   | Micromonas                      | ASV036 | 0.220  | 0.797 | 0.005 | Delaware Coast Fall |
| Stramenopiles | MAST-3E                         | ASV090 | 0.206  | 0.603 | 0.016 | Delaware Coast Fall |
| Alveolata     | Dino-Group-II-Clade-5_X         | ASV093 | 0.123  | 0.785 | 0.002 | Delaware Coast Fall |
| Stramenopiles | Aplanochytrium                  | ASV150 | 0.086  | 0.666 | 0.005 | Delaware Coast Fall |
| Alveolata     | Dino-Group-II-Clade-14_X        | ASV095 | 0.082  | 0.855 | 0.001 | Delaware Coast Fall |
| Chlorophyta   | Chloroparvula                   | ASV060 | 0.082  | 0.765 | 0.002 | Delaware Coast Fall |
| Stramenopiles | MAST-3E                         | ASV282 | 0.080  | 0.551 | 0.024 | Delaware Coast Fall |
| Chlorophyta   | Ostreococcus                    | ASV314 | 0.077  | 0.636 | 0.013 | Delaware Coast Fall |
| Chlorophyta   | Pseudoscourfieldia              | ASV084 | 0.074  | 0.797 | 0.001 | Delaware Coast Fall |
| Alveolata     | Dino-Group-II-Clade-1_X         | ASV106 | 0.067  | 0.703 | 0.009 | Delaware Coast Fall |
| Cryptophyta   | Teleaulax                       | ASV091 | 0.065  | 0.741 | 0.003 | Delaware Coast Fall |
| Alveolata     | Karlodinium                     | ASV165 | 0.064  | 0.720 | 0.005 | Delaware Coast Fall |
| Alveolata     | Dino-Group-II-Clade-17_X        | ASV213 | 0.056  | 0.908 | 0.001 | Delaware Coast Fall |
| Alveolata     | Prorocentrum                    | ASV274 | 0.055  | 0.591 | 0.018 | Delaware Coast Fall |

|               |                                 |         |       |       |       |                       |
|---------------|---------------------------------|---------|-------|-------|-------|-----------------------|
| Stramenopiles | MAST-3E                         | ASV368  | 0.052 | 0.709 | 0.004 | Delaware Coast Fall   |
| Alveolata     | Dino-Group-II-Clade-1_X         | ASV200  | 0.047 | 0.606 | 0.019 | Delaware Coast Fall   |
| Stramenopiles | Aureococcus                     | ASV441  | 0.045 | 0.693 | 0.004 | Delaware Coast Fall   |
| Chlorophyta   | Ostreococcus                    | ASV034  | 1.861 | 0.714 | 0.004 | Delaware Coast Summer |
| Stramenopiles | MAST-9D                         | ASV094  | 1.672 | 0.894 | 0.001 | Delaware Coast Summer |
| Alveolata     | Gyrodinium                      | ASV063  | 0.771 | 0.617 | 0.010 | Delaware Coast Summer |
| Alveolata     | Dinophyceae                     | ASV116  | 0.628 | 0.646 | 0.008 | Delaware Coast Summer |
| Alveolata     | Gonyaulax                       | ASV148  | 0.592 | 0.627 | 0.006 | Delaware Coast Summer |
| Alveolata     | Dadayiella                      | ASV392  | 0.475 | 0.866 | 0.001 | Delaware Coast Summer |
| Stramenopiles | MAST-4B                         | ASV141  | 0.306 | 0.527 | 0.025 | Delaware Coast Summer |
| Alveolata     | Dino-Group-II-Clade-3_X         | ASV235  | 0.274 | 0.530 | 0.034 | Delaware Coast Summer |
| Alveolata     | Gonyaulax                       | ASV197  | 0.272 | 0.570 | 0.013 | Delaware Coast Summer |
| Alveolata     | Strombidiidae                   | ASV523  | 0.226 | 0.665 | 0.002 | Delaware Coast Summer |
| Alveolata     | Dinophyceae                     | ASV503  | 0.204 | 0.598 | 0.019 | Delaware Coast Summer |
| Alveolata     | Dino-Group-II-Clade-10-and-11_X | ASV221  | 0.165 | 0.467 | 0.049 | Delaware Coast Summer |
| Alveolata     | Dino-Group-II-Clade-10-and-11_X | ASV132  | 0.154 | 0.591 | 0.011 | Delaware Coast Summer |
| Alveolata     | Dino-Group-II-Clade-7_X         | ASV547  | 0.150 | 0.563 | 0.025 | Delaware Coast Summer |
| Alveolata     | Dino-Group-II-Clade-20_X        | ASV087  | 0.114 | 0.522 | 0.035 | Delaware Coast Summer |
| Alveolata     | Dino-Group-II                   | ASV1832 | 0.097 | 0.560 | 0.022 | Delaware Coast Summer |
| Alveolata     | Dino-Group-II                   | ASV1402 | 0.094 | 0.474 | 0.043 | Delaware Coast Summer |
| Alveolata     | Gonyaulax                       | ASV822  | 0.091 | 0.620 | 0.013 | Delaware Coast Summer |
| Alveolata     | Dinophyceae                     | ASV1729 | 0.077 | 0.491 | 0.025 | Delaware Coast Summer |
| Alveolata     | Dino-Group-II-Clade-22_X        | ASV850  | 0.074 | 0.489 | 0.031 | Delaware Coast Summer |
| Picozoa       | Picozoa_subdivision_2_XXXX      | ASV605  | 0.065 | 0.543 | 0.033 | Delaware Coast Summer |
| Alveolata     | Dino-Group-II-Clade-12_X        | ASV1935 | 0.048 | 0.613 | 0.009 | Delaware Coast Summer |
| Alveolata     | Euduboscquella                  | ASV2219 | 0.040 | 0.527 | 0.025 | Delaware Coast Summer |
| Alveolata     | Dino-Group-III_XX               | ASV433  | 0.035 | 0.544 | 0.028 | Delaware Coast Summer |
| Alveolata     | Dinophyceae                     | ASV1151 | 0.035 | 0.494 | 0.048 | Delaware Coast Summer |
| Alveolata     | Dino-Group-II-Clade-3_X         | ASV1930 | 0.032 | 0.573 | 0.025 | Delaware Coast Summer |
| Alveolata     | Dino-Group-I-Clade-3_X          | ASV469  | 0.032 | 0.524 | 0.023 | Delaware Coast Summer |

|                   |                                 |         |       |       |       |                          |
|-------------------|---------------------------------|---------|-------|-------|-------|--------------------------|
| Alveolata         | NASSO_1                         | ASV301  | 0.031 | 0.530 | 0.025 | Delaware<br>Coast Summer |
| Stramenopile<br>s | MAST-7B                         | ASV1293 | 0.028 | 0.631 | 0.010 | Delaware<br>Coast Summer |
| Stramenopile<br>s | MAST-3I                         | ASV1840 | 0.028 | 0.475 | 0.044 | Delaware<br>Coast Summer |
| Chlorophyta       | Chlorellales_X                  | ASV117  | 0.296 | 0.850 | 0.001 | Virginia<br>Coast        |
| Alveolata         | Dinophyceae                     | ASV040  | 0.262 | 0.889 | 0.001 | Virginia<br>Coast        |
| Chlorophyta       | Picochlorum                     | ASV101  | 0.262 | 0.837 | 0.001 | Virginia<br>Coast        |
| Stramenopile<br>s | Leptocylindrus                  | ASV010  | 0.239 | 0.814 | 0.001 | Virginia<br>Coast        |
| Stramenopile<br>s | Guinardia                       | ASV065  | 0.227 | 0.838 | 0.001 | Virginia<br>Coast        |
| Stramenopile<br>s | Thalassiosiraceae               | ASV127  | 0.212 | 0.975 | 0.001 | Virginia<br>Coast        |
| Stramenopile<br>s | Cyclotella                      | ASV121  | 0.195 | 0.901 | 0.001 | Virginia<br>Coast        |
| Alveolata         | Dino-Group-II-Clade-6_X         | ASV160  | 0.182 | 0.739 | 0.002 | Virginia<br>Coast        |
| Stramenopile<br>s | Minutocellus                    | ASV161  | 0.162 | 0.919 | 0.001 | Virginia<br>Coast        |
| Alveolata         | Dino-Group-II-Clade-6_X         | ASV055  | 0.156 | 0.986 | 0.001 | Virginia<br>Coast        |
| Alveolata         | Strombidiidae_X                 | ASV097  | 0.132 | 0.779 | 0.001 | Virginia<br>Coast        |
| Alveolata         | Dino-Group-II-Clade-6_X         | ASV113  | 0.119 | 0.674 | 0.001 | Virginia<br>Coast        |
| Stramenopile<br>s | Leptocylindrus                  | ASV307  | 0.108 | 0.604 | 0.016 | Virginia<br>Coast        |
| Alveolata         | Pelagostrobilidium              | ASV246  | 0.104 | 0.893 | 0.001 | Virginia<br>Coast        |
| Stramenopile<br>s | Cyclotella                      | ASV234  | 0.102 | 0.946 | 0.001 | Virginia<br>Coast        |
| Chlorophyta       | Crustomastigaceae               | ASV476  | 0.082 | 0.715 | 0.001 | Virginia<br>Coast        |
| Stramenopile<br>s | Skeletonema                     | ASV259  | 0.080 | 0.842 | 0.001 | Virginia<br>Coast        |
| Alveolata         | Dino-Group-I-Clade-4_X          | ASV198  | 0.078 | 0.916 | 0.001 | Virginia<br>Coast        |
| Alveolata         | Dino-Group-II-Clade-13_X        | ASV295  | 0.075 | 0.961 | 0.001 | Virginia<br>Coast        |
| Chlorophyta       | Picochlorum                     | ASV516  | 0.069 | 0.585 | 0.020 | Virginia<br>Coast        |
| Rhizaria          | Ebria                           | ASV267  | 0.063 | 0.964 | 0.001 | Virginia<br>Coast        |
| Alveolata         | Strombidiidae                   | ASV302  | 0.062 | 0.666 | 0.010 | Virginia<br>Coast        |
| Alveolata         | Dino-Group-II-Clade-10-and-11_X | ASV430  | 0.062 | 0.845 | 0.001 | Virginia<br>Coast        |
| Alveolata         | Pseudotontonia                  | ASV147  | 0.059 | 0.516 | 0.043 | Virginia<br>Coast        |
| Alveolata         | Alexandrium                     | ASV646  | 0.056 | 0.540 | 0.018 | Virginia<br>Coast        |
| Alveolata         | Spirotrichea                    | ASV475  | 0.054 | 0.617 | 0.016 | Virginia<br>Coast        |
| Chlorophyta       | Picochlorum                     | ASV768  | 0.053 | 0.474 | 0.041 | Virginia<br>Coast        |

|             |                  |        |       |       |       |                |
|-------------|------------------|--------|-------|-------|-------|----------------|
| Rhodophyta  | Porphyridiales_X | ASV519 | 0.052 | 0.898 | 0.001 | Virginia Coast |
| Chlorophyta | Micromonas       | ASV286 | 0.048 | 0.794 | 0.005 | Virginia Coast |
| Cryptophyta | Baffinella       | ASV545 | 0.046 | 0.590 | 0.014 | Virginia Coast |

\*Mean relative abundance (%) of each ASV calculated across all samples.

+Group-equalized point-biserial correlation coefficient (r.g) indicating the strength of association between each ASV and sample stations.

**Table S7:** Bacterial ASVs significantly correlating with DOM variables.

| DOM Variable       | Phylum          | Genus                       | ASV    | Pearson Correlation Coefficient | P Value |
|--------------------|-----------------|-----------------------------|--------|---------------------------------|---------|
| Tryptophan-like C1 | Pseudomonadota  | Clade_Ia                    | ASV002 | 0.384                           | 0.028   |
| Tryptophan-like C1 | Pseudomonadota  | SAR86_clade                 | ASV008 | 0.476                           | 0.005   |
| Tryptophan-like C1 | Actinomycetota  | Candidatus_Actinomarina     | ASV011 | 0.373                           | 0.032   |
| Tryptophan-like C1 | Pseudomonadota  | SAR86_clade                 | ASV014 | 0.424                           | 0.014   |
| Tryptophan-like C1 | Bacteroidota    | NS5_marine_group            | ASV025 | 0.445                           | 0.009   |
| Tryptophan-like C1 | Pseudomonadota  | AEGEAN-169_marine_group     | ASV030 | 0.453                           | 0.008   |
| Tryptophan-like C1 | Pseudomonadota  | SAR116_clade_unclassified   | ASV035 | 0.387                           | 0.026   |
| Tryptophan-like C1 | Pseudomonadota  | Candidatus_Puniceispirillum | ASV037 | 0.395                           | 0.023   |
| Tryptophan-like C1 | Pseudomonadota  | SAR86_clade                 | ASV048 | 0.557                           | 0.001   |
| Tryptophan-like C1 | Pseudomonadota  | Ectothiorhodospiraceae      | ASV055 | 0.386                           | 0.026   |
| Tryptophan-like C1 | Pseudomonadota  | SUP05_cluster               | ASV058 | 0.471                           | 0.006   |
| Tryptophan-like C1 | Pseudomonadota  | OCS116_clade                | ASV062 | 0.598                           | 0.000   |
| Tryptophan-like C1 | Pseudomonadota  | OM43_clade                  | ASV088 | 0.530                           | 0.002   |
| Tryptophan-like C1 | Pseudomonadota  | AEGEAN-169_marine_group     | ASV100 | 0.573                           | 0.000   |
| Tryptophan-like C1 | Pseudomonadota  | Luminiphilus                | ASV117 | 0.346                           | 0.048   |
| Tryptophan-like C1 | Pseudomonadota  | AEGEAN-169_marine_group     | ASV139 | 0.470                           | 0.006   |
| Tryptophan-like C1 | Pseudomonadota  | Pseudohongiella             | ASV146 | 0.491                           | 0.004   |
| Tryptophan-like C1 | Pseudomonadota  | Paracoccaceae_unclassified  | ASV149 | 0.491                           | 0.004   |
| Tryptophan-like C1 | Bacteroidota    | NS9_marine_group            | ASV166 | 0.392                           | 0.024   |
| Tryptophan-like C1 | Cyanobacteriota | Synechococcus_CC9902        | ASV167 | 0.531                           | 0.001   |
| Tryptophan-like C1 | Bacteroidota    | NS5_marine_group            | ASV171 | 0.412                           | 0.017   |
| Tryptophan-like C1 | Actinomycetota  | Candidatus_Actinomarina     | ASV175 | 0.363                           | 0.038   |
| Tryptophan-like C1 | Pseudomonadota  | OM60(NOR5)_clade            | ASV179 | 0.379                           | 0.030   |
| Tryptophan-like C1 | Pseudomonadota  | OM75_clade                  | ASV183 | 0.458                           | 0.007   |
| Tryptophan-like C1 | Pseudomonadota  | Ectothiorhodospiraceae      | ASV198 | 0.448                           | 0.009   |
| Tryptophan-like C1 | Pseudomonadota  | UBA10353_marine_group       | ASV214 | 0.388                           | 0.026   |
| Tryptophan-like C1 | Pseudomonadota  | Porticoccus                 | ASV224 | 0.543                           | 0.001   |

|                    |                               |                               |        |       |       |
|--------------------|-------------------------------|-------------------------------|--------|-------|-------|
| Tryptophan-like C1 | Pseudomonadota                | Pseudohongiella               | ASV227 | 0.494 | 0.003 |
| Tryptophan-like C1 | Bacillota                     | Staphylococcus                | ASV245 | 0.392 | 0.024 |
| Tryptophan-like C1 | Pseudomonadota                | SAR86_clade                   | ASV246 | 0.459 | 0.007 |
| Tryptophan-like C1 | Pseudomonadota                | Clade_IV                      | ASV251 | 0.384 | 0.027 |
| Tryptophan-like C1 | Marinimicrobia (SAR406_clade) | Marinimicrobia (SAR406_clade) | ASV277 | 0.428 | 0.013 |
| Tryptophan-like C1 | Pseudomonadota                | IS-44                         | ASV278 | 0.477 | 0.005 |
| Tryptophan-like C1 | Pseudomonadota                | Leucotrichaceae               | ASV294 | 0.423 | 0.014 |
| Tryptophan-like C1 | Pseudomonadota                | Woeseia                       | ASV302 | 0.543 | 0.001 |
| Tryptophan-like C1 | Actinomycetota                | Candidatus_Actinomarina       | ASV305 | 0.486 | 0.004 |
| Tryptophan-like C1 | Bacteroidota                  | NS5_marine_group              | ASV310 | 0.431 | 0.012 |
| Tryptophan-like C1 | Bacteroidota                  | Cryomorphaceae                | ASV316 | 0.429 | 0.013 |
| Tryptophan-like C1 | Actinomycetota                | Candidatus_Actinomarina       | ASV321 | 0.447 | 0.009 |
| Tryptophan-like C1 | Pseudomonadota                | SAR86_clade                   | ASV360 | 0.405 | 0.019 |
| Tryptophan-like C1 | Pseudomonadota                | OM182_clade                   | ASV396 | 0.443 | 0.010 |
| Tryptophan-like C1 | Actinomycetota                | Candidatus_Actinomarina       | ASV399 | 0.391 | 0.024 |
| Tryptophan-like C1 | Pseudomonadota                | OM43_clade                    | ASV408 | 0.404 | 0.020 |
| Tryptophan-like C1 | Pseudomonadota                | KI89A_clade                   | ASV415 | 0.550 | 0.001 |
| Tryptophan-like C1 | Pseudomonadota                | KI89A_clade                   | ASV424 | 0.387 | 0.026 |
| Tryptophan-like C1 | Pseudomonadota                | Coxiella                      | ASV430 | 0.514 | 0.002 |
| Tryptophan-like C1 | Pseudomonadota                | Defluviococcales              | ASV452 | 0.346 | 0.048 |
| Tryptophan-like C1 | Pseudomonadota                | Candidatus_Punicispirillum    | ASV453 | 0.451 | 0.008 |
| Tryptophan-like C1 | Pseudomonadota                | Haliaceae_unclassified        | ASV467 | 0.463 | 0.007 |
| Tryptophan-like C1 | Bacteroidota                  | NS5_marine_group              | ASV468 | 0.358 | 0.041 |
| Tryptophan-like C1 | Pseudomonadota                | Defluviococcales              | ASV495 | 0.436 | 0.011 |
| Tryptophan-like C1 | Pseudomonadota                | Marivibrio                    | ASV500 | 0.534 | 0.001 |
| Tryptophan-like C1 | Verrucomicrobiota             | MB11C04_marine_group          | ASV516 | 0.350 | 0.046 |
| Tryptophan-like C1 | Pseudomonadota                | Clade_IV                      | ASV517 | 0.410 | 0.018 |
| Tryptophan-like C1 | Pseudomonadota                | Paracoccaceae_unclassified    | ASV558 | 0.358 | 0.041 |
| Tryptophan-like C1 | Pseudomonadota                | OM182_clade                   | ASV585 | 0.418 | 0.016 |
| Tryptophan-like C1 | Verrucomicrobiota             | MB11C04_marine_group          | ASV595 | 0.502 | 0.003 |

|                    |                               |                                  |         |        |       |
|--------------------|-------------------------------|----------------------------------|---------|--------|-------|
| Tryptophan-like C1 | Marinimicrobia_(SAR406_clade) | Marinimicrobia_(SAR406_clade)    | ASV621  | 0.382  | 0.028 |
| Tryptophan-like C1 | Pseudomonadota                | Litorivicinus                    | ASV639  | 0.375  | 0.031 |
| Tryptophan-like C1 | Bdellovibrionota              | Bacteriovoracaceae               | ASV702  | 0.410  | 0.018 |
| Tryptophan-like C1 | Pseudomonadota                | Magnetospiraceae                 | ASV715  | 0.360  | 0.039 |
| Tryptophan-like C1 | Bacteroidota                  | Crocinitomix                     | ASV783  | 0.418  | 0.015 |
| Tryptophan-like C1 | Bacteroidota                  | Bacteroidia_unclassified         | ASV788  | 0.467  | 0.006 |
| Tryptophan-like C1 | Bacteroidota                  | NS5_marine_group                 | ASV800  | 0.513  | 0.002 |
| Tryptophan-like C1 | Bacteroidota                  | NS9_marine_group                 | ASV841  | 0.390  | 0.025 |
| Tryptophan-like C1 | Pseudomonadota                | Puniceispirillales               | ASV844  | 0.349  | 0.047 |
| Tryptophan-like C1 | Pseudomonadota                | Pseudoalteromonas                | ASV915  | 0.457  | 0.007 |
| Tryptophan-like C1 | Bacteroidota                  | Aureisphaera                     | ASV924  | 0.378  | 0.030 |
| Tryptophan-like C1 | Pseudomonadota                | SAR86_clade                      | ASV967  | 0.386  | 0.026 |
| Tryptophan-like C1 | Pseudomonadota                | Marinomonas                      | ASV981  | 0.443  | 0.010 |
| Tryptophan-like C1 | Bacteroidota                  | NS5_marine_group                 | ASV993  | 0.487  | 0.004 |
| Tryptophan-like C1 | Pseudomonadota                | Gammaproteobacteria_unclassified | ASV1022 | 0.429  | 0.013 |
| Tryptophan-like C1 | Pseudomonadota                | Defluviicoccales                 | ASV1065 | 0.391  | 0.024 |
| Tryptophan-like C1 | Pseudomonadota                | SAR86_clade                      | ASV1192 | 0.358  | 0.041 |
| Tryptophan-like C1 | Pseudomonadota                | SAR86_clade                      | ASV1410 | 0.391  | 0.025 |
| Tryptophan-like C1 | Cyanobacteriota               | Synechococcus_CC9902             | ASV001  | -0.430 | 0.013 |
| Tryptophan-like C1 | Pseudomonadota                | Caulobacter                      | ASV009  | -0.394 | 0.023 |
| Tryptophan-like C1 | Pseudomonadota                | Halomonas                        | ASV034  | -0.386 | 0.027 |
| Tryptophan-like C1 | Bacteroidota                  | NS2b_marine_group                | ASV052  | -0.497 | 0.003 |
| Tryptophan-like C1 | Pseudomonadota                | Litorivicinus                    | ASV099  | -0.345 | 0.049 |
| Tryptophan-like C1 | Pseudomonadota                | Alcanivorax                      | ASV159  | -0.533 | 0.001 |
| Tryptophan-like C1 | Cyanobacteriota               | Cyanobiaceae_unclassified        | ASV216  | -0.385 | 0.027 |
| Tryptophan-like C1 | Pseudomonadota                | Pseudoalteromonas                | ASV222  | -0.406 | 0.019 |
| Tryptophan-like C1 | Pseudomonadota                | OM43_clade                       | ASV289  | -0.381 | 0.029 |
| Tryptophan-like C1 | Bacteroidota                  | NS7_marine_group                 | ASV303  | -0.445 | 0.009 |
| Tryptophan-like C1 | Bacteroidota                  | NS4_marine_group                 | ASV317  | -0.373 | 0.033 |
| Tryptophan-like C1 | Pseudomonadota                | SAR86_clade                      | ASV356  | -0.387 | 0.026 |

|                    |                               |                                  |         |        |       |
|--------------------|-------------------------------|----------------------------------|---------|--------|-------|
| Tryptophan-like C1 | Pseudomonadota                | Methylobacterium                 | ASV391  | -0.387 | 0.026 |
| Tryptophan-like C1 | Bacteroidota                  | NS5_marine_group                 | ASV469  | -0.412 | 0.017 |
| Tryptophan-like C1 | Pseudomonadota                | Ponticaulis                      | ASV489  | -0.360 | 0.040 |
| Tryptophan-like C1 | Pseudomonadota                | Pseudoalteromonas                | ASV551  | -0.347 | 0.048 |
| Tryptophan-like C1 | Verrucomicrobiota             | Puniceicoccaceae_unclassified    | ASV567  | -0.414 | 0.017 |
| Tryptophan-like C1 | Pseudomonadota                | Paracoccaceae_unclassified       | ASV587  | -0.350 | 0.046 |
| Tryptophan-like C1 | Pseudomonadota                | Alphaproteobacteria_unclassified | ASV714  | -0.395 | 0.023 |
| Tryptophan-like C1 | Bacteroidota                  | Fluviicola                       | ASV731  | -0.354 | 0.043 |
| Tryptophan-like C1 | Marinimicrobia_(SAR406_clade) | Marinimicrobia_(SAR406_clade)    | ASV798  | -0.418 | 0.016 |
| Tryptophan-like C1 | Pseudomonadota                | Marinobacter                     | ASV808  | -0.356 | 0.042 |
| Tryptophan-like C1 | Pseudomonadota                | Methylophagaceae_unclassified    | ASV885  | -0.373 | 0.033 |
| Tryptophan-like C1 | Bacteroidota                  | Saprospiraceae                   | ASV895  | -0.372 | 0.033 |
| Tryptophan-like C1 | Pseudomonadota                | OM60(NOR5)_clade                 | ASV939  | -0.382 | 0.028 |
| Tryptophan-like C1 | Pseudomonadota                | Alteromonadaceae_unclassified    | ASV960  | -0.365 | 0.037 |
| Tryptophan-like C1 | Pseudomonadota                | mle1-7                           | ASV987  | -0.371 | 0.034 |
| Tryptophan-like C1 | Pseudomonadota                | Sphingopyxis                     | ASV1007 | -0.474 | 0.005 |
| Tryptophan-like C1 | Pseudomonadota                | Paracoccaceae_unclassified       | ASV1048 | -0.353 | 0.044 |
| Tryptophan-like C1 | Marinimicrobia_(SAR406_clade) | Marinimicrobia_(SAR406_clade)    | ASV1096 | -0.411 | 0.018 |
| Tryptophan-like C1 | Pseudomonadota                | Nitrosomonadaceae_unclassified   | ASV1097 | -0.378 | 0.030 |
| Tryptophan-like C1 | Bdellovibrionota              | OM27_clade                       | ASV1111 | -0.419 | 0.015 |
| Tryptophan-like C1 | Bacteroidota                  | NS9_marine_group                 | ASV1153 | -0.396 | 0.023 |
| Tryptophan-like C1 | Cyanobacteriota               | Synechococcus_CC9902             | ASV1180 | -0.349 | 0.046 |
| Tryptophan-like C1 | Bacteroidota                  | NS9_marine_group                 | ASV1194 | -0.408 | 0.018 |
| Tryptophan-like C1 | Bacteria_unclassified         | Bacteria_unclassified            | ASV1352 | -0.420 | 0.015 |
| Tryptophan-like C1 | Bacteroidota                  | Pseudotenacibaculum              | ASV1365 | -0.427 | 0.013 |
| Tryptophan-like C1 | Pseudomonadota                | Coxiella                         | ASV1394 | -0.444 | 0.010 |
| Tryptophan-like C1 | Pseudomonadota                | Paracoccaceae_unclassified       | ASV1397 | -0.360 | 0.039 |
| Tryptophan-like C1 | Bdellovibrionota              | OM27_clade                       | ASV1403 | -0.424 | 0.014 |
| Tryptophan-like C1 | Pseudomonadota                | Coxiella                         | ASV1416 | -0.372 | 0.033 |
| Tryptophan-like C1 | Pseudomonadota                | Clade_II                         | ASV1457 | -0.383 | 0.028 |

|                    |                               |                                              |         |        |       |
|--------------------|-------------------------------|----------------------------------------------|---------|--------|-------|
| Tryptophan-like C1 | Pseudomonadota                | IS-44                                        | ASV1504 | -0.347 | 0.048 |
| Tryptophan-like C1 | Bacteroidota                  | NS4_marine_group                             | ASV1508 | -0.357 | 0.042 |
| Tryptophan-like C1 | Pseudomonadota                | Sphingopyxis                                 | ASV1530 | -0.368 | 0.035 |
| Tryptophan-like C1 | Cyanobacteriota               | Synechococcus_CC9902                         | ASV1554 | -0.371 | 0.033 |
| Tryptophan-like C1 | Pseudomonadota                | Porticoccus                                  | ASV1581 | -0.351 | 0.045 |
| Tryptophan-like C1 | Pseudomonadota                | Magnetospiraceae                             | ASV1594 | -0.362 | 0.038 |
| Tryptophan-like C1 | Bacteroidota                  | NS5_marine_group                             | ASV1629 | -0.383 | 0.028 |
| Tryptophan-like C1 | Pseudomonadota                | Alphaproteobacteria                          | ASV1651 | -0.367 | 0.036 |
| Tryptophan-like C1 | Pseudomonadota                | SAR116_clade                                 | ASV1661 | -0.352 | 0.045 |
| Tryptophan-like C1 | Bacteroidota                  | Crocinitomicaceae_unclassified               | ASV1710 | -0.360 | 0.040 |
| Tryptophan-like C1 | Pseudomonadota                | Candidatus_Hepatincola_insertae_sedis_family | ASV1734 | -0.426 | 0.013 |
| Tryptophan-like C1 | Pseudomonadota                | Magnetospiraceae                             | ASV1746 | -0.384 | 0.027 |
| Tryptophan-like C1 | Bacteria_unclassified         | Bacteria_unclassified                        | ASV1749 | -0.442 | 0.010 |
| Tryptophan-like C1 | Thermodesulfobacteriota       | PB19                                         | ASV1751 | -0.420 | 0.015 |
| Tryptophan-like C1 | Bacteroidota                  | Flavobacteriaceae_unclassified               | ASV1768 | -0.397 | 0.022 |
| Tryptophan-like C1 | Pseudomonadota                | Unknown_Family                               | ASV1814 | -0.428 | 0.013 |
| Tryptophan-like C1 | Bacteroidota                  | Flavobacteriaceae                            | ASV1835 | -0.382 | 0.028 |
| Tryptophan-like C1 | Pseudomonadota                | Thalassolituus                               | ASV1855 | -0.465 | 0.006 |
| Tryptophan-like C1 | Actinomycetota                | Candidatus_Actinomarina                      | ASV1874 | -0.393 | 0.024 |
| Tryptophan-like C1 | Bacteroidota                  | Roseivirga                                   | ASV1895 | -0.485 | 0.004 |
| Tryptophan-like C1 | Bdellovibrionota              | Peredibacter                                 | ASV1897 | -0.459 | 0.007 |
| Tryptophan-like C1 | Bdellovibrionota              | OM27_clade                                   | ASV1938 | -0.362 | 0.039 |
| Tryptophan-like C1 | Actinomycetota                | Acidimicrobiia_unclassified                  | ASV1941 | -0.449 | 0.009 |
| Tryptophan-like C1 | Bacteroidota                  | NS9_marine_group                             | ASV2052 | -0.381 | 0.029 |
| Tryptophan-like C1 | Marinimicrobia_(SAR406_clade) | Marinimicrobia_(SAR406_clade)                | ASV2057 | -0.351 | 0.046 |
| Tryptophan-like C1 | Bacteroidota                  | NS11-12_marine_group                         | ASV2059 | -0.353 | 0.044 |
| Tryptophan-like C1 | Myxococcota                   | Nannocystaceae                               | ASV2080 | -0.396 | 0.023 |
| Tryptophan-like C1 | Verrucomicrobiota             | Roseibacillus                                | ASV2082 | -0.402 | 0.020 |
| Tryptophan-like C1 | Bacteroidota                  | NS9_marine_group                             | ASV2083 | -0.438 | 0.011 |
| Tryptophan-like C1 | Pseudomonadota                | Gammaproteobacteria_unclassified             | ASV2115 | -0.351 | 0.045 |

|                    |                         |                                   |         |        |       |
|--------------------|-------------------------|-----------------------------------|---------|--------|-------|
| Tryptophan-like C1 | Pseudomonadota          | SAR116_clade_unclassified         | ASV2126 | -0.345 | 0.049 |
| Tryptophan-like C1 | Bacteria_unclassified   | Bacteria_unclassified             | ASV2129 | -0.418 | 0.016 |
| Tryptophan-like C1 | Verrucomicrobiota       | SCGC_AAA164-E04                   | ASV2152 | -0.361 | 0.039 |
| Tryptophan-like C1 | Pseudomonadota          | Psychrosphaera                    | ASV2153 | -0.376 | 0.031 |
| Tryptophan-like C1 | Pseudomonadota          | Defluviicoccales                  | ASV2187 | -0.364 | 0.037 |
| Tryptophan-like C1 | Pseudomonadota          | Sphingomonas                      | ASV2242 | -0.387 | 0.026 |
| Tryptophan-like C1 | Pseudomonadota          | Clade_I_unclassified              | ASV2255 | -0.365 | 0.037 |
| Tryptophan-like C1 | Thermodesulfobacteriota | Bradymonadales                    | ASV2334 | -0.372 | 0.033 |
| Tryptophan-like C1 | Verrucomicrobiota       | SCGC_AAA164-E04                   | ASV2502 | -0.376 | 0.031 |
| Tryptophan-like C1 | Actinomycetota          | Actinomarinales                   | ASV2528 | -0.356 | 0.042 |
| Tryptophan-like C1 | Cyanobacteriota         | Synechococcus_CC9902              | ASV2533 | -0.374 | 0.032 |
| Tryptophan-like C1 | Pseudomonadota          | Gammaproteobacteria_unclassified  | ASV2568 | -0.355 | 0.042 |
| Tryptophan-like C1 | Bacteroidota            | Crocinitomix                      | ASV2618 | -0.360 | 0.040 |
| Tryptophan-like C1 | Bacteria_unclassified   | Bacteria_unclassified             | ASV2637 | -0.365 | 0.037 |
| Tryptophan-like C1 | Pseudomonadota          | UBA10353_marine_group             | ASV2658 | -0.393 | 0.024 |
| Tryptophan-like C1 | Verrucomicrobiota       | Lentimonas                        | ASV2775 | -0.403 | 0.020 |
| Tryptophan-like C1 | Pseudomonadota          | Saccharospirillaceae_unclassified | ASV2824 | -0.471 | 0.006 |
| Tryptophan-like C1 | Pseudomonadota          | Gammaproteobacteria_unclassified  | ASV2934 | -0.352 | 0.045 |
| Tryptophan-like C1 | Bacteroidota            | Dokdonia                          | ASV2984 | -0.488 | 0.004 |
| Tryptophan-like C1 | Pseudomonadota          | Thalassotalea                     | ASV3009 | -0.354 | 0.044 |
| Tryptophan-like C1 | Pseudomonadota          | Psychrobacter                     | ASV3077 | -0.350 | 0.046 |
| Tryptophan-like C1 | Pseudomonadota          | SAR86_clade                       | ASV3099 | -0.353 | 0.044 |
| Tryptophan-like C1 | Myxococcota             | Nannocystaceae                    | ASV3151 | -0.352 | 0.045 |
| Tryptophan-like C1 | Bacteroidota            | Vicingus                          | ASV3430 | -0.359 | 0.040 |
| Tryptophan-like C1 | Pseudomonadota          | Azospira                          | ASV3567 | -0.381 | 0.029 |
| Tryptophan-like C1 | Patescibacteria         | Candidatus_Peregrinibacteria      | ASV3591 | -0.369 | 0.035 |
| Tryptophan-like C1 | Bacillota               | Bacillaceae_unclassified          | ASV3629 | -0.362 | 0.038 |
| Tryptophan-like C1 | Fusobacteriota          | Propionigenium                    | ASV3668 | -0.372 | 0.033 |
| Tryptophan-like C1 | Pseudomonadota          | SAR86_clade                       | ASV3733 | -0.352 | 0.044 |
| Tryptophan-like C1 | Cyanobacteriota         | Cyanobiaceae_unclassified         | ASV4206 | -0.400 | 0.021 |

|                    |                               |                                  |         |        |       |
|--------------------|-------------------------------|----------------------------------|---------|--------|-------|
| Tryptophan-like C1 | Pseudomonadota                | Gammaproteobacteria              | ASV4264 | -0.408 | 0.018 |
| Tryptophan-like C1 | Pseudomonadota                | Alphaproteobacteria_unclassified | ASV4474 | -0.385 | 0.027 |
| Tryptophan-like C1 | Thermodesulfobacteriota       | PB19                             | ASV5289 | -0.354 | 0.044 |
| Tryptophan-like C1 | Cyanobacteriota               | Synechococcus_CC9902             | ASV5683 | -0.435 | 0.011 |
| Tryptophan-like C1 | Pseudomonadota                | Paracoccaceae_unclassified       | ASV7166 | -0.410 | 0.018 |
| Tryptophan-like C1 | Pseudomonadota                | Sphingobium                      | ASV8000 | -0.392 | 0.024 |
| Humic-like C2      | Bacteroidota                  | NS7_marine_group                 | ASV208  | 0.349  | 0.047 |
| Humic-like C2      | Pseudomonadota                | Thalassospira                    | ASV287  | 0.560  | 0.001 |
| Humic-like C2      | Pseudomonadota                | Thalassolituus                   | ASV290  | 0.446  | 0.009 |
| Humic-like C2      | Bacteroidota                  | NS9_marine_group                 | ASV308  | 0.456  | 0.008 |
| Humic-like C2      | Pseudomonadota                | Sphingobium                      | ASV337  | 0.382  | 0.028 |
| Humic-like C2      | Bacteroidota                  | Flavobacteriaceae_unclassified   | ASV375  | 0.345  | 0.050 |
| Humic-like C2      | Bacteroidota                  | Aquibacter                       | ASV449  | 0.470  | 0.006 |
| Humic-like C2      | Bacteroidota                  | NS7_marine_group                 | ASV454  | 0.399  | 0.022 |
| Humic-like C2      | Planctomycetota               | Mariniblastus                    | ASV475  | 0.483  | 0.004 |
| Humic-like C2      | Pseudomonadota                | Ponticaulis                      | ASV489  | 0.348  | 0.047 |
| Humic-like C2      | Bdellovibrionota              | Oligoflexaceae                   | ASV539  | 0.355  | 0.043 |
| Humic-like C2      | Bacteroidota                  | Fluviicola                       | ASV610  | 0.345  | 0.049 |
| Humic-like C2      | Bacteroidota                  | Cyclobacteriaceae                | ASV664  | 0.467  | 0.006 |
| Humic-like C2      | Pseudomonadota                | Woeseia                          | ASV670  | 0.347  | 0.048 |
| Humic-like C2      | Bacteroidota                  | Pseudofulvibacter                | ASV752  | 0.360  | 0.040 |
| Humic-like C2      | Bacteroidota                  | Cryomorphaceae                   | ASV832  | 0.431  | 0.012 |
| Humic-like C2      | Bacteria_unclassified         | Bacteria_unclassified            | ASV858  | 0.354  | 0.043 |
| Humic-like C2      | Thermodesulfobacteriota       | PB19                             | ASV1039 | 0.407  | 0.019 |
| Humic-like C2      | Planctomycetota               | CL500-3                          | ASV1151 | 0.405  | 0.019 |
| Humic-like C2      | Marinimicrobia_(SAR406_clade) | Marinimicrobia_(SAR406_clade)    | ASV1164 | 0.430  | 0.012 |
| Humic-like C2      | Pseudomonadota                | Marinobacter                     | ASV1208 | 0.387  | 0.026 |
| Humic-like C2      | Campylobacterota              | Sulfurovum                       | ASV1506 | 0.439  | 0.011 |
| Humic-like C2      | Bacteroidota                  | Sphingobacteriales_unclassified  | ASV2254 | 0.386  | 0.027 |
| Humic-like C2      | Cyanobacteriota               | Synechococcus_CC9902             | ASV167  | -0.364 | 0.038 |
| Humic-like C2      | Bacillota                     | Staphylococcus                   | ASV245  | -0.498 | 0.003 |
| Humic-like C3      | Cyanobacteriota               | Trichodesmium_IMS101             | ASV090  | 0.382  | 0.028 |
| Humic-like C3      | Pseudomonadota                | Thalassospira                    | ASV207  | 0.356  | 0.042 |
| Humic-like C3      | Pseudomonadota                | Thalassospira                    | ASV287  | 0.443  | 0.010 |
| Humic-like C3      | Pseudomonadota                | Thalassolituus                   | ASV290  | 0.358  | 0.041 |
| Humic-like C3      | Pseudomonadota                | Vibrio                           | ASV367  | 0.346  | 0.048 |
| Humic-like C3      | Bacteroidota                  | Flavobacteriaceae_unclassified   | ASV375  | 0.365  | 0.037 |
| Humic-like C3      | Bacteroidota                  | Aquibacter                       | ASV449  | 0.351  | 0.045 |
| Humic-like C3      | Pseudomonadota                | Ponticaulis                      | ASV489  | 0.547  | 0.001 |

|                  |                              |                                   |         |        |       |
|------------------|------------------------------|-----------------------------------|---------|--------|-------|
| Humic-like C3    | Pseudomonadota               | Saccharospirillaceae_unclassified | ASV1171 | 0.368  | 0.035 |
| Humic-like C3    | Pseudomonadota               | Psychrosphaera                    | ASV2153 | 0.344  | 0.050 |
| Humic-like C3    | Pseudomonadota               | AEGEAN-169_marine_group           | ASV030  | -0.377 | 0.031 |
| Humic-like C3    | Pseudomonadota               | AEGEAN-169_marine_group           | ASV040  | -0.386 | 0.027 |
| Humic-like C3    | Pseudomonadota               | Candidatus_Puniceispirillum       | ASV209  | -0.377 | 0.031 |
| Humic-like C3    | Bacillota                    | Staphylococcus                    | ASV245  | -0.394 | 0.023 |
| Humic-like C3    | Pseudomonadota               | Magnetospiraceae                  | ASV523  | -0.488 | 0.004 |
| Humic-like C3    | Pseudomonadota               | AEGEAN-169_marine_group           | ASV534  | -0.430 | 0.012 |
| Humic-like C3    | Pseudomonadota               | MWH-UniP1_aquatic_group           | ASV698  | -0.350 | 0.046 |
| Humic-like C3    | Pseudomonadota               | Haliaceae_unclassified            | ASV751  | -0.347 | 0.048 |
| Humic-like C3    | Pseudomonadota               | SAR86_clade                       | ASV1410 | -0.349 | 0.046 |
| Tyrosine-like C3 | Cyanobacteriota              | Prochlorococcus_MIT9313           | ASV003  | 0.536  | 0.001 |
| Tyrosine-like C3 | Pseudomonadota               | Clade_II                          | ASV004  | 0.508  | 0.003 |
| Tyrosine-like C3 | Cyanobacteriota              | Cyanobium_PCC-6307                | ASV006  | 0.447  | 0.009 |
| Tyrosine-like C3 | Pseudomonadota               | Clade_Ib                          | ASV007  | 0.487  | 0.004 |
| Tyrosine-like C3 | Actinomycetota               | Candidatus_Actinomarina           | ASV010  | 0.363  | 0.038 |
| Tyrosine-like C3 | Cyanobacteriota              | Synechococcus_CC9902              | ASV016  | 0.639  | 0.000 |
| Tyrosine-like C3 | SAR324_clade(Marine_group_B) | SAR324_clade_insertae_sedis       | ASV024  | 0.410  | 0.018 |
| Tyrosine-like C3 | Pseudomonadota               | Paracoccaceae_unclassified        | ASV026  | 0.611  | 0.000 |
| Tyrosine-like C3 | Pseudomonadota               | AEGEAN-169_marine_group           | ASV030  | 0.436  | 0.011 |
| Tyrosine-like C3 | Pseudomonadota               | Paracoccaceae_unclassified        | ASV032  | 0.555  | 0.001 |
| Tyrosine-like C3 | Pseudomonadota               | SAR116_clade_unclassified         | ASV035  | 0.566  | 0.001 |
| Tyrosine-like C3 | Pseudomonadota               | SAR116_clade                      | ASV036  | 0.493  | 0.004 |
| Tyrosine-like C3 | Pseudomonadota               | SAR116_clade                      | ASV042  | 0.408  | 0.019 |
| Tyrosine-like C3 | Pseudomonadota               | SAR86_clade                       | ASV043  | 0.549  | 0.001 |
| Tyrosine-like C3 | Bacteroidota                 | NS5_marine_group                  | ASV050  | 0.420  | 0.015 |
| Tyrosine-like C3 | Pseudomonadota               | AEGEAN-169_marine_group           | ASV051  | 0.355  | 0.042 |
| Tyrosine-like C3 | Pseudomonadota               | Paracoccaceae_unclassified        | ASV054  | 0.458  | 0.007 |
| Tyrosine-like C3 | Pseudomonadota               | Ectothiorhodospiraceae            | ASV055  | 0.373  | 0.032 |
| Tyrosine-like C3 | Pseudomonadota               | S25-593                           | ASV057  | 0.578  | 0.000 |
| Tyrosine-like C3 | Pseudomonadota               | OCS116_clade                      | ASV062  | 0.563  | 0.001 |
| Tyrosine-like C3 | Pseudomonadota               | SAR116_clade                      | ASV069  | 0.492  | 0.004 |
| Tyrosine-like C3 | Pseudomonadota               | SAR86_clade                       | ASV070  | 0.381  | 0.029 |

|                  |                               |                                  |        |       |       |
|------------------|-------------------------------|----------------------------------|--------|-------|-------|
| Tyrosine-like C3 | Pseudomonadota                | MWH-UniP1_aquatic_group          | ASV078 | 0.387 | 0.026 |
| Tyrosine-like C3 | Cyanobacteriota               | Cyanobiaceae_unclassified        | ASV087 | 0.519 | 0.002 |
| Tyrosine-like C3 | Pseudomonadota                | Clade_III                        | ASV094 | 0.491 | 0.004 |
| Tyrosine-like C3 | Cyanobacteriota               | Cyanobiaceae_unclassified        | ASV096 | 0.492 | 0.004 |
| Tyrosine-like C3 | Pseudomonadota                | Parvibaculaceae                  | ASV113 | 0.415 | 0.016 |
| Tyrosine-like C3 | Bacteroidota                  | Marinoscillum                    | ASV122 | 0.386 | 0.027 |
| Tyrosine-like C3 | Pseudomonadota                | S25-593                          | ASV135 | 0.594 | 0.000 |
| Tyrosine-like C3 | Pseudomonadota                | OM60(NOR5)_clade                 | ASV144 | 0.416 | 0.016 |
| Tyrosine-like C3 | Pseudomonadota                | SAR116_clade                     | ASV151 | 0.599 | 0.000 |
| Tyrosine-like C3 | Verrucomicrobiota             | DEV007                           | ASV161 | 0.483 | 0.004 |
| Tyrosine-like C3 | Pseudomonadota                | SAR86_clade                      | ASV162 | 0.359 | 0.040 |
| Tyrosine-like C3 | Pseudomonadota                | OM75_clade                       | ASV172 | 0.395 | 0.023 |
| Tyrosine-like C3 | Cyanobacteriota               | Prochlorococcus_MIT9313          | ASV173 | 0.515 | 0.002 |
| Tyrosine-like C3 | Bacteroidota                  | NS4_marine_group                 | ASV181 | 0.420 | 0.015 |
| Tyrosine-like C3 | Verrucomicrobiota             | MB11C04_marine_group             | ASV190 | 0.414 | 0.016 |
| Tyrosine-like C3 | Pseudomonadota                | SAR92_clade                      | ASV192 | 0.433 | 0.012 |
| Tyrosine-like C3 | Marinimicrobia_(SAR406_clade) | Marinimicrobia_(SAR406_clade)    | ASV197 | 0.412 | 0.017 |
| Tyrosine-like C3 | Pseudomonadota                | Gammaproteobacteria_unclassified | ASV200 | 0.385 | 0.027 |
| Tyrosine-like C3 | Bacteroidota                  | NS2b_marine_group                | ASV201 | 0.498 | 0.003 |
| Tyrosine-like C3 | Bacteroidota                  | NS9_marine_group                 | ASV202 | 0.543 | 0.001 |
| Tyrosine-like C3 | Pseudomonadota                | Candidatus_Puniceispirillum      | ASV209 | 0.493 | 0.004 |
| Tyrosine-like C3 | Bacteroidota                  | NS2b_marine_group                | ASV210 | 0.465 | 0.006 |
| Tyrosine-like C3 | Pseudomonadota                | Asciidiehabitans                 | ASV217 | 0.471 | 0.006 |
| Tyrosine-like C3 | Planctomycetota               | OM190                            | ASV218 | 0.505 | 0.003 |
| Tyrosine-like C3 | Bacteroidota                  | Formosa                          | ASV225 | 0.550 | 0.001 |
| Tyrosine-like C3 | Pseudomonadota                | Clade_II                         | ASV228 | 0.446 | 0.009 |
| Tyrosine-like C3 | Bacteroidota                  | Fluviicola                       | ASV258 | 0.416 | 0.016 |
| Tyrosine-like C3 | Actinomycetota                | Sva0996_marine_group             | ASV259 | 0.365 | 0.036 |
| Tyrosine-like C3 | Pseudomonadota                | Leucotrichaceae                  | ASV286 | 0.365 | 0.037 |
| Tyrosine-like C3 | Pseudomonadota                | SAR86_clade                      | ASV297 | 0.386 | 0.027 |

|                  |                               |                                |        |       |       |
|------------------|-------------------------------|--------------------------------|--------|-------|-------|
| Tyrosine-like C3 | Cyanobacteriota               | Prochlorococcus_MIT9313        | ASV300 | 0.508 | 0.003 |
| Tyrosine-like C3 | Verrucomicrobiota             | R76-B128                       | ASV301 | 0.559 | 0.001 |
| Tyrosine-like C3 | Cyanobacteriota               | Cyanobium_PCC-6307             | ASV314 | 0.524 | 0.002 |
| Tyrosine-like C3 | Bacteroidota                  | Marinoscillum                  | ASV331 | 0.462 | 0.007 |
| Tyrosine-like C3 | Bacteroidota                  | NS4_marine_group               | ASV334 | 0.533 | 0.001 |
| Tyrosine-like C3 | Pseudomonadota                | Magnetospiraceae               | ASV335 | 0.409 | 0.018 |
| Tyrosine-like C3 | Pseudomonadota                | Thalassobaculales              | ASV339 | 0.393 | 0.024 |
| Tyrosine-like C3 | Cyanobacteriota               | Synechococcus_CC9902           | ASV378 | 0.352 | 0.045 |
| Tyrosine-like C3 | Bacteroidota                  | NS9_marine_group               | ASV382 | 0.430 | 0.012 |
| Tyrosine-like C3 | Marinimicrobia_(SAR406_clade) | Marinimicrobia_(SAR406_clade)  | ASV383 | 0.368 | 0.035 |
| Tyrosine-like C3 | Planctomycetota               | Pirellulaceae                  | ASV392 | 0.522 | 0.002 |
| Tyrosine-like C3 | Cyanobacteriota               | Cyanobiaceae_unclassified      | ASV406 | 0.358 | 0.041 |
| Tyrosine-like C3 | Verrucomicrobiota             | MB11C04_marine_group           | ASV407 | 0.536 | 0.001 |
| Tyrosine-like C3 | Cyanobacteriota               | Prochlorococcus_MIT9313        | ASV420 | 0.426 | 0.013 |
| Tyrosine-like C3 | Pseudomonadota                | Candidatus_Punicispirillum     | ASV422 | 0.444 | 0.010 |
| Tyrosine-like C3 | Cyanobacteriota               | Cyanobiaceae_unclassified      | ASV426 | 0.421 | 0.015 |
| Tyrosine-like C3 | Cyanobacteriota               | Cyanobiaceae_unclassified      | ASV429 | 0.356 | 0.042 |
| Tyrosine-like C3 | Cyanobacteriota               | Atelocyanobacterium_(UCYN-A)   | ASV479 | 0.525 | 0.002 |
| Tyrosine-like C3 | Cyanobacteriota               | Cyanobiaceae_unclassified      | ASV481 | 0.369 | 0.035 |
| Tyrosine-like C3 | Verrucomicrobiota             | R76-B128                       | ASV491 | 0.531 | 0.001 |
| Tyrosine-like C3 | Actinomycetota                | Candidatus_Actinomarina        | ASV515 | 0.385 | 0.027 |
| Tyrosine-like C3 | Pseudomonadota                | Magnetospiraceae               | ASV569 | 0.421 | 0.015 |
| Tyrosine-like C3 | Pseudomonadota                | AEGEAN-169_marine_group        | ASV604 | 0.421 | 0.015 |
| Tyrosine-like C3 | Pseudomonadota                | SAR86_clade                    | ASV623 | 0.431 | 0.012 |
| Tyrosine-like C3 | Bacteroidota                  | NS5_marine_group               | ASV632 | 0.397 | 0.022 |
| Tyrosine-like C3 | Verrucomicrobiota             | Coraliomargarita               | ASV647 | 0.426 | 0.014 |
| Tyrosine-like C3 | Actinomycetota                | Microbacteriaceae_unclassified | ASV651 | 0.390 | 0.025 |
| Tyrosine-like C3 | Bdellovibrionota              | Bacteriovoracaceae             | ASV702 | 0.366 | 0.036 |
| Tyrosine-like C3 | Thermodesulfobacteriota       | PB19                           | ASV710 | 0.463 | 0.007 |
| Tyrosine-like C3 | Cyanobacteriota               | Prochlorococcus_MIT9313        | ASV719 | 0.392 | 0.024 |

|                  |                               |                               |         |        |       |
|------------------|-------------------------------|-------------------------------|---------|--------|-------|
| Tyrosine-like C3 | Pseudomonadota                | Pseudomonadales_unclassified  | ASV736  | 0.463  | 0.007 |
| Tyrosine-like C3 | Pseudomonadota                | SAR86_clade                   | ASV739  | 0.345  | 0.049 |
| Tyrosine-like C3 | Marinimicrobia_(SAR406_clade) | Marinimicrobia_(SAR406_clade) | ASV763  | 0.356  | 0.042 |
| Tyrosine-like C3 | Verrucomicrobiota             | MB11C04_marine_group          | ASV778  | 0.365  | 0.037 |
| Tyrosine-like C3 | Pseudomonadota                | Alcanivorax                   | ASV818  | 0.377  | 0.031 |
| Tyrosine-like C3 | Pseudomonadota                | SAR116_clade                  | ASV861  | 0.531  | 0.001 |
| Tyrosine-like C3 | Bacteroidota                  | NS7_marine_group              | ASV862  | 0.435  | 0.011 |
| Tyrosine-like C3 | Bacteria_unclassified         | Bacteria_unclassified         | ASV943  | 0.361  | 0.039 |
| Tyrosine-like C3 | Marinimicrobia_(SAR406_clade) | Marinimicrobia_(SAR406_clade) | ASV1058 | 0.349  | 0.047 |
| Tyrosine-like C3 | Pseudomonadota                | MWH-UniP1_aquatic_group       | ASV1176 | 0.442  | 0.010 |
| Tyrosine-like C3 | Pseudomonadota                | SAR86_clade                   | ASV1213 | 0.415  | 0.016 |
| Tyrosine-like C3 | Myxococcota                   | P3OB-42                       | ASV1230 | 0.419  | 0.015 |
| Tyrosine-like C3 | Thermodesulfobacteriota       | PB19                          | ASV1251 | 0.344  | 0.050 |
| Tyrosine-like C3 | Bdellovibrionota              | Oligoflexaceae                | ASV1277 | 0.435  | 0.011 |
| Tyrosine-like C3 | Pseudomonadota                | OM60(NOR5)_clade              | ASV1520 | 0.363  | 0.038 |
| Tyrosine-like C3 | Thermodesulfobacteriota       | PB19                          | ASV1588 | 0.442  | 0.010 |
| Tyrosine-like C3 | Bdellovibrionota              | OM27_clade                    | ASV1700 | 0.345  | 0.049 |
| Tyrosine-like C3 | Pseudomonadota                | Defluviicoccales              | ASV1800 | 0.351  | 0.045 |
| Tyrosine-like C3 | Bacillota                     | Streptococcus                 | ASV1875 | 0.363  | 0.038 |
| Tyrosine-like C3 | Pseudomonadota                | Caulobacter                   | ASV009  | -0.388 | 0.026 |
| Tyrosine-like C3 | Cyanobacteriota               | Cyanobium_PCC-6307            | ASV019  | -0.520 | 0.002 |
| Tyrosine-like C3 | Pseudomonadota                | HIMB11                        | ASV023  | -0.543 | 0.001 |
| Tyrosine-like C3 | Pseudomonadota                | Paracoccaceae_unclassified    | ASV029  | -0.359 | 0.040 |
| Tyrosine-like C3 | Bacteroidota                  | NS2b_marine_group             | ASV052  | -0.524 | 0.002 |
| Tyrosine-like C3 | Cyanobacteriota               | Synechococcus_CC9902          | ASV056  | -0.496 | 0.003 |
| Tyrosine-like C3 | Pseudomonadota                | Cupriavidus                   | ASV059  | -0.373 | 0.032 |
| Tyrosine-like C3 | Pseudomonadota                | Planktomarina                 | ASV061  | -0.523 | 0.002 |
| Tyrosine-like C3 | Cyanobacteriota               | Synechococcus_CC9902          | ASV074  | -0.537 | 0.001 |
| Tyrosine-like C3 | Bacteroidota                  | Formosa                       | ASV075  | -0.502 | 0.003 |
| Tyrosine-like C3 | Pseudomonadota                | Comamonadaceae_unclassified   | ASV079  | -0.371 | 0.034 |

|                  |                               |                                  |        |        |       |
|------------------|-------------------------------|----------------------------------|--------|--------|-------|
| Tyrosine-like C3 | Bacteroidota                  | NS4_marine_group                 | ASV086 | -0.472 | 0.006 |
| Tyrosine-like C3 | Actinomycetota                | Microbacteriaceae_unclassified   | ASV092 | -0.472 | 0.006 |
| Tyrosine-like C3 | Bacteroidota                  | Flavobacteriaceae_unclassified   | ASV142 | -0.388 | 0.026 |
| Tyrosine-like C3 | Bacteroidota                  | NS5_marine_group                 | ASV150 | -0.391 | 0.025 |
| Tyrosine-like C3 | Cyanobacteriota               | Cyanobium_PCC-6307               | ASV164 | -0.481 | 0.005 |
| Tyrosine-like C3 | Bacteroidota                  | Cryomorphaceae                   | ASV174 | -0.509 | 0.003 |
| Tyrosine-like C3 | Cyanobacteriota               | Cyanobium_PCC-6307               | ASV176 | -0.494 | 0.003 |
| Tyrosine-like C3 | Bacillota                     | Acholeplasma                     | ASV206 | -0.387 | 0.026 |
| Tyrosine-like C3 | Marinimicrobia_(SAR406_clade) | Marinimicrobia_(SAR406_clade)    | ASV223 | -0.418 | 0.015 |
| Tyrosine-like C3 | Pseudomonadota                | AEGEAN-169_marine_group          | ASV231 | -0.426 | 0.013 |
| Tyrosine-like C3 | Bacteroidota                  | NS5_marine_group                 | ASV270 | -0.613 | 0.000 |
| Tyrosine-like C3 | Actinomycetota                | Sva0996_marine_group             | ASV285 | -0.399 | 0.022 |
| Tyrosine-like C3 | Pseudomonadota                | OM43_clade                       | ASV289 | -0.418 | 0.015 |
| Tyrosine-like C3 | Bacteroidota                  | Winogradskyella                  | ASV292 | -0.356 | 0.042 |
| Tyrosine-like C3 | Pseudomonadota                | OM60(NOR5)_clade                 | ASV298 | -0.570 | 0.001 |
| Tyrosine-like C3 | Actinomycetota                | Ilumatobacteraceae_unclassified  | ASV299 | -0.415 | 0.016 |
| Tyrosine-like C3 | Pseudomonadota                | Alphaproteobacteria_unclassified | ASV322 | -0.452 | 0.008 |
| Tyrosine-like C3 | Bacteroidota                  | NS5_marine_group                 | ASV324 | -0.352 | 0.045 |
| Tyrosine-like C3 | Actinomycetota                | Candidatus_Aquiluna              | ASV336 | -0.511 | 0.002 |
| Tyrosine-like C3 | Pseudomonadota                | Vibrio                           | ASV363 | -0.362 | 0.039 |
| Tyrosine-like C3 | Actinomycetota                | Gaiellales                       | ASV369 | -0.375 | 0.032 |
| Tyrosine-like C3 | Bacteroidota                  | Flavobacteriaceae_unclassified   | ASV375 | -0.396 | 0.023 |
| Tyrosine-like C3 | Bacteroidota                  | NS11-12_marine_group             | ASV380 | -0.505 | 0.003 |
| Tyrosine-like C3 | Bacteroidota                  | NS5_marine_group                 | ASV393 | -0.481 | 0.005 |
| Tyrosine-like C3 | Bacteroidota                  | Flavobacteriaceae_unclassified   | ASV421 | -0.410 | 0.018 |
| Tyrosine-like C3 | Bacteroidota                  | NS9_marine_group                 | ASV423 | -0.520 | 0.002 |
| Tyrosine-like C3 | Pseudomonadota                | Paracoccaceae_unclassified       | ASV439 | -0.485 | 0.004 |
| Tyrosine-like C3 | Pseudomonadota                | Haliaceae_unclassified           | ASV482 | -0.398 | 0.022 |
| Tyrosine-like C3 | Planctomycetota               | Pirellulaceae                    | ASV484 | -0.362 | 0.039 |
| Tyrosine-like C3 | Pseudomonadota                | Clade_III                        | ASV498 | -0.456 | 0.008 |

|                  |                   |                                |        |        |       |
|------------------|-------------------|--------------------------------|--------|--------|-------|
| Tyrosine-like C3 | Pseudomonadota    | Novosphingobium                | ASV499 | -0.365 | 0.036 |
| Tyrosine-like C3 | Cyanobacteriota   | Synechococcus_CC9902           | ASV505 | -0.510 | 0.002 |
| Tyrosine-like C3 | Cyanobacteriota   | Synechococcus_CC9902           | ASV507 | -0.532 | 0.001 |
| Tyrosine-like C3 | Actinomycetota    | Actinobacteria_unclassified    | ASV512 | -0.353 | 0.044 |
| Tyrosine-like C3 | Cyanobacteriota   | Synechococcus_CC9902           | ASV521 | -0.528 | 0.002 |
| Tyrosine-like C3 | Pseudomonadota    | Alcanivorax                    | ASV527 | -0.491 | 0.004 |
| Tyrosine-like C3 | Bacteroidota      | Saprospiraceae                 | ASV541 | -0.460 | 0.007 |
| Tyrosine-like C3 | Pseudomonadota    | Azospira                       | ASV571 | -0.366 | 0.036 |
| Tyrosine-like C3 | Bacteroidota      | NS9_marine_group               | ASV573 | -0.346 | 0.049 |
| Tyrosine-like C3 | Verrucomicrobiota | DEV007                         | ASV578 | -0.416 | 0.016 |
| Tyrosine-like C3 | Bacteroidota      | Flavobacteriaceae_unclassified | ASV625 | -0.422 | 0.015 |
| Tyrosine-like C3 | Bacteroidota      | Flavobacteriaceae              | ASV626 | -0.511 | 0.002 |
| Tyrosine-like C3 | Bacteroidota      | NS5_marine_group               | ASV628 | -0.457 | 0.008 |
| Tyrosine-like C3 | Cyanobacteriota   | Cyanobiaceae_unclassified      | ASV633 | -0.479 | 0.005 |
| Tyrosine-like C3 | Bacteroidota      | NS5_marine_group               | ASV655 | -0.432 | 0.012 |
| Tyrosine-like C3 | Bacteroidota      | Flavobacteriales_unclassified  | ASV658 | -0.507 | 0.003 |
| Tyrosine-like C3 | Pseudomonadota    | Hellea                         | ASV666 | -0.512 | 0.002 |
| Tyrosine-like C3 | Bacteroidota      | Saprospiraceae                 | ASV681 | -0.533 | 0.001 |
| Tyrosine-like C3 | Bacteroidota      | NS5_marine_group               | ASV684 | -0.373 | 0.033 |
| Tyrosine-like C3 | Cyanobacteriota   | Synechococcus_CC9902           | ASV686 | -0.456 | 0.008 |
| Tyrosine-like C3 | Bacteroidota      | NS11-12_marine_group           | ASV730 | -0.433 | 0.012 |
| Tyrosine-like C3 | Bacteroidota      | Fluviicola                     | ASV731 | -0.389 | 0.025 |
| Tyrosine-like C3 | Pseudomonadota    | Luminiphilus                   | ASV764 | -0.380 | 0.029 |
| Tyrosine-like C3 | Planctomycetota   | OM190                          | ASV774 | -0.389 | 0.025 |
| Tyrosine-like C3 | Rhodothermota     | Rhodothermaceae                | ASV777 | -0.474 | 0.005 |
| Tyrosine-like C3 | Pseudomonadota    | Litorimicrobium                | ASV784 | -0.484 | 0.004 |
| Tyrosine-like C3 | Pseudomonadota    | SUP05_cluster                  | ASV819 | -0.458 | 0.007 |
| Tyrosine-like C3 | Verrucomicrobiota | DEV007                         | ASV823 | -0.462 | 0.007 |
| Tyrosine-like C3 | Cyanobacteriota   | Cyanobium_PCC-6307             | ASV849 | -0.422 | 0.015 |
| Tyrosine-like C3 | Cyanobacteriota   | Synechococcus_CC9902           | ASV909 | -0.433 | 0.012 |

|                     |                   |                                |         |        |       |
|---------------------|-------------------|--------------------------------|---------|--------|-------|
| Tyrosine-like<br>C3 | Pseudomonadota    | Haliaceae_unclassified         | ASV917  | -0.458 | 0.007 |
| Tyrosine-like<br>C3 | Bacteroidota      | Crocinitomix                   | ASV940  | -0.400 | 0.021 |
| Tyrosine-like<br>C3 | Bacteroidota      | Cryomorphaceae                 | ASV968  | -0.437 | 0.011 |
| Tyrosine-like<br>C3 | Pseudomonadota    | SAR116_clade                   | ASV969  | -0.388 | 0.026 |
| Tyrosine-like<br>C3 | Pseudomonadota    | mle1-7                         | ASV987  | -0.353 | 0.044 |
| Tyrosine-like<br>C3 | Rhodothermota     | Rhodothermaceae                | ASV999  | -0.439 | 0.011 |
| Tyrosine-like<br>C3 | Bacteroidota      | NS5_marine_group               | ASV1006 | -0.409 | 0.018 |
| Tyrosine-like<br>C3 | Bacteroidota      | Saprospiraceae                 | ASV1013 | -0.380 | 0.029 |
| Tyrosine-like<br>C3 | Planctomycetota   | Pirellulaceae                  | ASV1021 | -0.381 | 0.029 |
| Tyrosine-like<br>C3 | Bacteroidota      | Cryomorphaceae_unclassified    | ASV1045 | -0.453 | 0.008 |
| Tyrosine-like<br>C3 | Verrucomicrobiota | Roseibacillus                  | ASV1050 | -0.530 | 0.002 |
| Tyrosine-like<br>C3 | Cyanobacteriota   | Synechococcus_CC9902           | ASV1055 | -0.473 | 0.005 |
| Tyrosine-like<br>C3 | Pseudomonadota    | KI89A_clade                    | ASV1059 | -0.436 | 0.011 |
| Tyrosine-like<br>C3 | Balneolota        | Balneolaceae                   | ASV1093 | -0.399 | 0.021 |
| Tyrosine-like<br>C3 | Pseudomonadota    | Nitrosomonadaceae_unclassified | ASV1097 | -0.462 | 0.007 |
| Tyrosine-like<br>C3 | Bacteroidota      | Crocinitomicaceae_unclassified | ASV1104 | -0.418 | 0.015 |
| Tyrosine-like<br>C3 | Bacteroidota      | Aureispira                     | ASV1139 | -0.558 | 0.001 |
| Tyrosine-like<br>C3 | Bacteroidota      | NS9_marine_group               | ASV1168 | -0.364 | 0.037 |
| Tyrosine-like<br>C3 | Cyanobacteriota   | Synechococcus_CC9902           | ASV1180 | -0.428 | 0.013 |
| Tyrosine-like<br>C3 | Planctomycetota   | OM190                          | ASV1190 | -0.392 | 0.024 |
| Tyrosine-like<br>C3 | Pseudomonadota    | SAR86_clade                    | ASV1248 | -0.460 | 0.007 |
| Tyrosine-like<br>C3 | Bacteroidota      | Saprospiraceae                 | ASV1294 | -0.458 | 0.007 |
| Tyrosine-like<br>C3 | Pseudomonadota    | Hyphomonadaceae_unclassified   | ASV1325 | -0.429 | 0.013 |
| Tyrosine-like<br>C3 | Pseudomonadota    | OM60(NOR5)_clade               | ASV1376 | -0.394 | 0.023 |
| Tyrosine-like<br>C3 | Bacteroidota      | Bacteroidia_unclassified       | ASV1393 | -0.436 | 0.011 |
| Tyrosine-like<br>C3 | Pseudomonadota    | Paracoccaceae_unclassified     | ASV1397 | -0.443 | 0.010 |
| Tyrosine-like<br>C3 | Bacteroidota      | Cryomorphaceae                 | ASV1400 | -0.444 | 0.010 |
| Tyrosine-like<br>C3 | Pseudomonadota    | OM60(NOR5)_clade               | ASV1417 | -0.376 | 0.031 |
| Tyrosine-like<br>C3 | Pseudomonadota    | Defluviicoccales               | ASV1477 | -0.411 | 0.017 |
| Tyrosine-like<br>C3 | Bdellovibrionota  | Pseudobacteriovorax            | ASV1491 | -0.460 | 0.007 |

|                  |                              |                                              |         |        |       |
|------------------|------------------------------|----------------------------------------------|---------|--------|-------|
| Tyrosine-like C3 | Pseudomonadota               | Gammaproteobacteria_unclassified             | ASV1500 | -0.436 | 0.011 |
| Tyrosine-like C3 | Pseudomonadota               | IS-44                                        | ASV1504 | -0.540 | 0.001 |
| Tyrosine-like C3 | Cyanobacteriota              | Cyanobiaceae_unclassified                    | ASV1534 | -0.366 | 0.036 |
| Tyrosine-like C3 | Pseudomonadota               | Magnetospiraceae                             | ASV1594 | -0.439 | 0.011 |
| Tyrosine-like C3 | Verrucomicrobiota            | Roseibacillus                                | ASV1618 | -0.530 | 0.002 |
| Tyrosine-like C3 | Bacteroidota                 | NS5_marine_group                             | ASV1629 | -0.453 | 0.008 |
| Tyrosine-like C3 | Cyanobacteriota              | Cyanobiaceae_unclassified                    | ASV1653 | -0.380 | 0.029 |
| Tyrosine-like C3 | Pseudomonadota               | SAR116_clade                                 | ASV1661 | -0.453 | 0.008 |
| Tyrosine-like C3 | Bacteroidota                 | Crocinitomicaceae_unclassified               | ASV1710 | -0.382 | 0.028 |
| Tyrosine-like C3 | Pseudomonadota               | Candidatus_Hepatincola_insertae_sedis_family | ASV1734 | -0.353 | 0.044 |
| Tyrosine-like C3 | Cyanobacteriota              | Cyanobium_PCC-6307                           | ASV1772 | -0.379 | 0.029 |
| Tyrosine-like C3 | Bacteroidota                 | Flavobacteriaceae                            | ASV1835 | -0.365 | 0.037 |
| Tyrosine-like C3 | Bdellovibrionota             | OM27_clade                                   | ASV1836 | -0.406 | 0.019 |
| Tyrosine-like C3 | Bacteroidota                 | NS11-12_marine_group                         | ASV2059 | -0.414 | 0.017 |
| Tyrosine-like C3 | Actinomycetota               | Candidatus_Actinomarina                      | ASV2086 | -0.372 | 0.033 |
| Tyrosine-like C3 | Pseudomonadota               | Francisella                                  | ASV2102 | -0.430 | 0.013 |
| Tyrosine-like C3 | Verrucomicrobiota            | SCGC_AAA164-E04                              | ASV2152 | -0.391 | 0.025 |
| Tyrosine-like C3 | SAR324_clade(Marine_group_B) | SAR324_clade_insertae_sedis                  | ASV2310 | -0.388 | 0.026 |
| Tyrosine-like C3 | Thermodesulfobacteriota      | Bradymonadales                               | ASV2334 | -0.383 | 0.028 |
| Tyrosine-like C3 | Verrucomicrobiota            | SCGC_AAA164-E04                              | ASV2502 | -0.346 | 0.048 |
| Tyrosine-like C3 | Pseudomonadota               | Gammaproteobacteria_unclassified             | ASV2568 | -0.350 | 0.046 |
| Tyrosine-like C3 | Bacteria_unclassified        | Bacteria_unclassified                        | ASV2637 | -0.354 | 0.043 |
| Tyrosine-like C3 | Pseudomonadota               | Paracoccaceae_unclassified                   | ASV3159 | -0.365 | 0.037 |
| Surfactant       | Pseudomonadota               | SAR86_clade                                  | ASV008  | 0.464  | 0.011 |
| Surfactant       | Actinomycetota               | Candidatus_Actinomarina                      | ASV011  | 0.407  | 0.028 |
| Surfactant       | Pseudomonadota               | SAR86_clade                                  | ASV014  | 0.417  | 0.024 |
| Surfactant       | Bacteroidota                 | NS5_marine_group                             | ASV025  | 0.461  | 0.012 |
| Surfactant       | Pseudomonadota               | Candidatus_Punicispirillum                   | ASV037  | 0.370  | 0.048 |
| Surfactant       | Pseudomonadota               | SAR86_clade                                  | ASV048  | 0.509  | 0.005 |
| Surfactant       | Pseudomonadota               | SUP05_cluster                                | ASV058  | 0.536  | 0.003 |
| Surfactant       | Pseudomonadota               | OCS116_clade                                 | ASV062  | 0.574  | 0.001 |
| Surfactant       | Pseudomonadota               | Amylibacter                                  | ASV082  | 0.404  | 0.030 |
| Surfactant       | Pseudomonadota               | OM43_clade                                   | ASV088  | 0.495  | 0.006 |

|            |                               |                               |        |       |       |
|------------|-------------------------------|-------------------------------|--------|-------|-------|
| Surfactant | Pseudomonadota                | AEGEAN-169_marine_group       | ASV100 | 0.442 | 0.016 |
| Surfactant | Bacteroidota                  | NS9_marine_group              | ASV136 | 0.477 | 0.009 |
| Surfactant | Pseudomonadota                | AEGEAN-169_marine_group       | ASV139 | 0.519 | 0.004 |
| Surfactant | Pseudomonadota                | Pseudohongiella               | ASV146 | 0.534 | 0.003 |
| Surfactant | Pseudomonadota                | Paracoccaceae_unclassified    | ASV149 | 0.531 | 0.003 |
| Surfactant | Bacteroidota                  | NS9_marine_group              | ASV166 | 0.413 | 0.026 |
| Surfactant | Bacteroidota                  | Flavobacteriaceae             | ASV169 | 0.392 | 0.035 |
| Surfactant | Bacteroidota                  | NS5_marine_group              | ASV171 | 0.421 | 0.023 |
| Surfactant | Actinomycetota                | Candidatus_Actinomarina       | ASV175 | 0.460 | 0.012 |
| Surfactant | Pseudomonadota                | OM60(NOR5)_clade              | ASV179 | 0.423 | 0.022 |
| Surfactant | Pseudomonadota                | Asciidiaceihabitans           | ASV182 | 0.389 | 0.037 |
| Surfactant | Pseudomonadota                | OM75_clade                    | ASV183 | 0.461 | 0.012 |
| Surfactant | Pseudomonadota                | Ectothiorhodospiraceae        | ASV198 | 0.471 | 0.010 |
| Surfactant | Bacteroidota                  | NS9_marine_group              | ASV212 | 0.395 | 0.034 |
| Surfactant | Pseudomonadota                | UBA10353_marine_group         | ASV214 | 0.465 | 0.011 |
| Surfactant | Pseudomonadota                | Porticoccus                   | ASV224 | 0.578 | 0.001 |
| Surfactant | Pseudomonadota                | Pseudohongiella               | ASV227 | 0.593 | 0.001 |
| Surfactant | Pseudomonadota                | SAR86_clade                   | ASV246 | 0.579 | 0.001 |
| Surfactant | Pseudomonadota                | Clade_IV                      | ASV251 | 0.598 | 0.001 |
| Surfactant | Pseudomonadota                | Defluviicoccales              | ASV264 | 0.454 | 0.013 |
| Surfactant | Marinimicrobia_(SAR406_clade) | Marinimicrobia_(SAR406_clade) | ASV277 | 0.444 | 0.016 |
| Surfactant | Pseudomonadota                | IS-44                         | ASV278 | 0.610 | 0.000 |
| Surfactant | Pseudomonadota                | Leucotrichaceae               | ASV294 | 0.495 | 0.006 |
| Surfactant | Pseudomonadota                | Woeseia                       | ASV302 | 0.453 | 0.014 |
| Surfactant | Actinomycetota                | Candidatus_Actinomarina       | ASV305 | 0.425 | 0.022 |
| Surfactant | Marinimicrobia_(SAR406_clade) | Marinimicrobia_(SAR406_clade) | ASV309 | 0.435 | 0.018 |
| Surfactant | Bacteroidota                  | NS5_marine_group              | ASV310 | 0.377 | 0.044 |
| Surfactant | Bacteroidota                  | NS9_marine_group              | ASV330 | 0.471 | 0.010 |
| Surfactant | Pseudomonadota                | SAR86_clade                   | ASV360 | 0.546 | 0.002 |
| Surfactant | Pseudomonadota                | OM182_clade                   | ASV396 | 0.540 | 0.003 |
| Surfactant | Actinomycetota                | Candidatus_Actinomarina       | ASV399 | 0.386 | 0.039 |
| Surfactant | Pseudomonadota                | OM43_clade                    | ASV408 | 0.439 | 0.017 |
| Surfactant | Pseudomonadota                | KI89A_clade                   | ASV415 | 0.505 | 0.005 |
| Surfactant | Planctomycetota               | Pla3_lineage                  | ASV419 | 0.526 | 0.003 |
| Surfactant | Pseudomonadota                | Clade_II                      | ASV428 | 0.389 | 0.037 |
| Surfactant | Pseudomonadota                | Coxiella                      | ASV430 | 0.554 | 0.002 |
| Surfactant | Pseudomonadota                | Candidatus_Puniceispirillum   | ASV453 | 0.452 | 0.014 |
| Surfactant | Pseudomonadota                | Haliaceae_unclassified        | ASV467 | 0.502 | 0.006 |
| Surfactant | Verrucomicrobiota             | SCGC_AAA164-E04               | ASV483 | 0.498 | 0.006 |
| Surfactant | Pseudomonadota                | Asciidiaceihabitans           | ASV490 | 0.503 | 0.005 |
| Surfactant | Pseudomonadota                | Defluviicoccales              | ASV495 | 0.436 | 0.018 |

|            |                               |                                |         |        |       |
|------------|-------------------------------|--------------------------------|---------|--------|-------|
| Surfactant | Pseudomonadota                | Marivibrio                     | ASV500  | 0.416  | 0.025 |
| Surfactant | Verrucomicrobiota             | MB11C04_marine_group           | ASV516  | 0.439  | 0.017 |
| Surfactant | Pseudomonadota                | Clade_IV                       | ASV517  | 0.369  | 0.049 |
| Surfactant | Bacteroidota                  | Saprospiraceae                 | ASV531  | 0.438  | 0.018 |
| Surfactant | Verrucomicrobiota             | MB11C04_marine_group           | ASV540  | 0.390  | 0.036 |
| Surfactant | Pseudomonadota                | Paracoccaceae_unclassified     | ASV558  | 0.423  | 0.022 |
| Surfactant | Pseudomonadota                | OM182_clade                    | ASV585  | 0.370  | 0.048 |
| Surfactant | Pseudomonadota                | Defluviicoccales               | ASV588  | 0.569  | 0.001 |
| Surfactant | Verrucomicrobiota             | MB11C04_marine_group           | ASV595  | 0.567  | 0.001 |
| Surfactant | Bacteroidota                  | Crocinitomicaceae_unclassified | ASV603  | 0.416  | 0.025 |
| Surfactant | Pseudomonadota                | SAR86_clade                    | ASV611  | 0.407  | 0.029 |
| Surfactant | Thermodesulfobacteriota       | Thermodesulfobacteriota        | ASV619  | 0.479  | 0.009 |
| Surfactant | Pseudomonadota                | SAR116_clade                   | ASV620  | 0.525  | 0.003 |
| Surfactant | Marinimicrobia_(SAR406_clade) | Marinimicrobia_(SAR406_clade)  | ASV621  | 0.570  | 0.001 |
| Surfactant | Pseudomonadota                | SAR92_clade                    | ASV631  | 0.422  | 0.023 |
| Surfactant | Pseudomonadota                | Litorivicinus                  | ASV639  | 0.411  | 0.027 |
| Surfactant | Bacteroidota                  | Flavobacteriaceae_unclassified | ASV656  | 0.407  | 0.028 |
| Surfactant | Pseudomonadota                | Paracoccaceae_unclassified     | ASV682  | 0.421  | 0.023 |
| Surfactant | Pseudomonadota                | Legionellaceae                 | ASV701  | 0.405  | 0.029 |
| Surfactant | Bacteroidota                  | NS5_marine_group               | ASV713  | 0.374  | 0.046 |
| Surfactant | Planctomycetota               | OM190                          | ASV722  | 0.505  | 0.005 |
| Surfactant | Pseudomonadota                | Ga0077536                      | ASV728  | 0.533  | 0.003 |
| Surfactant | Bacteroidota                  | Crocinitomix                   | ASV783  | 0.496  | 0.006 |
| Surfactant | Bacteroidota                  | Bacteroidia_unclassified       | ASV788  | 0.387  | 0.038 |
| Surfactant | Pseudomonadota                | Pseudomonadales_unclassified   | ASV790  | 0.420  | 0.023 |
| Surfactant | Bacteroidota                  | NS9_marine_group               | ASV841  | 0.394  | 0.035 |
| Surfactant | Pseudomonadota                | Puniceispirillales             | ASV844  | 0.437  | 0.018 |
| Surfactant | Actinomycetota                | Actinobacteria_unclassified    | ASV877  | 0.470  | 0.010 |
| Surfactant | Pseudomonadota                | Pseudoalteromonas              | ASV915  | 0.466  | 0.011 |
| Surfactant | Marinimicrobia_(SAR406_clade) | Marinimicrobia_(SAR406_clade)  | ASV922  | 0.574  | 0.001 |
| Surfactant | Bacteroidota                  | NS5_marine_group               | ASV993  | 0.410  | 0.027 |
| Surfactant | Pseudomonadota                | Defluviicoccales               | ASV1065 | 0.400  | 0.032 |
| Surfactant | Pseudomonadota                | SAR86_clade                    | ASV1079 | 0.467  | 0.011 |
| Surfactant | Actinomycetota                | Sva0996_marine_group           | ASV1196 | 0.377  | 0.044 |
| Surfactant | Pseudomonadota                | SAR86_clade                    | ASV1349 | 0.446  | 0.015 |
| Surfactant | Pseudomonadota                | SAR86_clade                    | ASV1410 | 0.601  | 0.001 |
| Surfactant | Pseudomonadota                | Coxiella                       | ASV1854 | 0.545  | 0.002 |
| Surfactant | Bacteroidota                  | NS9_marine_group               | ASV1965 | 0.396  | 0.033 |
| Surfactant | Cyanobacteriota               | Synechococcus_CC9902           | ASV001  | -0.406 | 0.029 |
| Surfactant | Bacteroidota                  | NS2b_marine_group              | ASV052  | -0.378 | 0.043 |
| Surfactant | Marinimicrobia_(SAR406_clade) | Marinimicrobia_(SAR406_clade)  | ASV350  | -0.384 | 0.039 |

|            |                |                                  |         |        |       |
|------------|----------------|----------------------------------|---------|--------|-------|
| Surfactant | Pseudomonadota | Alphaproteobacteria_unclassified | ASV665  | -0.385 | 0.039 |
| Surfactant | Pseudomonadota | Magnetospiraceae                 | ASV1594 | -0.378 | 0.043 |
| Surfactant | Pseudomonadota | Unknown_Family                   | ASV1814 | -0.367 | 0.050 |
| Surfactant | Actinomycetota | Acidimicrobiia_unclassified      | ASV1941 | -0.375 | 0.045 |
| Surfactant | Bacteroidota   | NS9_marine_group                 | ASV2083 | -0.368 | 0.050 |
| Surfactant | Pseudomonadota | Clade_I_unclassified             | ASV2255 | -0.394 | 0.035 |

**Table S8:** Protist ASVs significantly correlating with DOM variables.

| <b>DOM Variable</b> | <b>Division</b> | <b>Genus</b>             | <b>ASV</b> | <b>Pearson Correlation Coefficient</b> | <b>P Value</b> |
|---------------------|-----------------|--------------------------|------------|----------------------------------------|----------------|
| Tryptophan-like C1  | Chlorophyta     | Bathycoccus              | ASV008     | 0.416                                  | 0.020          |
| Tryptophan-like C1  | Alveolata       | Dinophyceae_unclassified | ASV011     | 0.509                                  | 0.003          |
| Tryptophan-like C1  | Stramenopiles   | Minidiscus               | ASV017     | 0.407                                  | 0.023          |
| Tryptophan-like C1  | Picozoa         | Picomonas                | ASV027     | 0.455                                  | 0.010          |
| Tryptophan-like C1  | Alveolata       | Prorocentrum             | ASV029     | 0.552                                  | 0.001          |
| Tryptophan-like C1  | Chlorophyta     | Micromonas               | ASV036     | 0.462                                  | 0.009          |
| Tryptophan-like C1  | Stramenopiles   | Pelagomonadales_clade_B1 | ASV041     | 0.533                                  | 0.002          |
| Tryptophan-like C1  | Stramenopiles   | Aureococcus              | ASV042     | 0.496                                  | 0.005          |
| Tryptophan-like C1  | Chlorophyta     | Pseudoscourfieldia       | ASV084     | 0.590                                  | 0.000          |
| Tryptophan-like C1  | Alveolata       | Suessiaceae_unclassified | ASV089     | 0.382                                  | 0.034          |
| Tryptophan-like C1  | Cryptophyta     | Teleaulax                | ASV091     | 0.397                                  | 0.027          |
| Tryptophan-like C1  | Alveolata       | Dino-Group-II-Clade-8_X  | ASV130     | 0.409                                  | 0.022          |
| Tryptophan-like C1  | Cryptophyta     | Teleaulax                | ASV171     | 0.482                                  | 0.006          |
| Tryptophan-like C1  | Stramenopiles   | MAST-1C                  | ASV175     | 0.382                                  | 0.034          |
| Tryptophan-like C1  | Alveolata       | Dinophyceae_unclassified | ASV182     | 0.494                                  | 0.005          |
| Tryptophan-like C1  | Alveolata       | Dino-Group-II-Clade-1_X  | ASV200     | 0.438                                  | 0.014          |
| Tryptophan-like C1  | Alveolata       | Dino-Group-II-Clade-7_X  | ASV212     | 0.472                                  | 0.007          |
| Tryptophan-like C1  | Alveolata       | Dino-Group-II-Clade-17_X | ASV213     | 0.454                                  | 0.010          |
| Tryptophan-like C1  | Stramenopiles   | MAST-7B                  | ASV237     | 0.428                                  | 0.016          |
| Tryptophan-like C1  | Alveolata       | Dino-Group-I-Clade-1_X   | ASV253     | 0.501                                  | 0.004          |
| Tryptophan-like C1  | Alveolata       | Dino-Group-II-Clade-14_X | ASV283     | 0.424                                  | 0.017          |
| Tryptophan-like C1  | Alveolata       | Dinophyceae_unclassified | ASV294     | 0.563                                  | 0.001          |
| Tryptophan-like C1  | Alveolata       | Dino-Group-II-Clade-1_X  | ASV306     | 0.661                                  | 0.000          |
| Tryptophan-like C1  | Alveolata       | Dino-Group-II-Clade-12_X | ASV399     | 0.597                                  | 0.000          |
| Tryptophan-like C1  | Alveolata       | Prorocentrum             | ASV408     | 0.487                                  | 0.005          |
| Tryptophan-like C1  | Stramenopiles   | MAST-1B                  | ASV450     | 0.414                                  | 0.020          |
| Tryptophan-like C1  | Alveolata       | Dino-Group-III_XX        | ASV505     | 0.356                                  | 0.050          |

|                    |               |                                  |         |        |       |
|--------------------|---------------|----------------------------------|---------|--------|-------|
| Tryptophan-like C1 | Alveolata     | Dinophyceae_unclassified         | ASV511  | 0.583  | 0.001 |
| Tryptophan-like C1 | Alveolata     | Dino-Group-II-Clade-12_X         | ASV565  | 0.379  | 0.035 |
| Tryptophan-like C1 | Telonemia     | Telonemia-Group-2_X              | ASV610  | 0.398  | 0.027 |
| Tryptophan-like C1 | Alveolata     | Prorocentrum                     | ASV664  | 0.411  | 0.022 |
| Tryptophan-like C1 | Telonemia     | Telonemia-Group-2_X              | ASV709  | 0.512  | 0.003 |
| Tryptophan-like C1 | Alveolata     | Dino-Group-I-Clade-4_X           | ASV726  | 0.382  | 0.034 |
| Tryptophan-like C1 | Chlorophyta   | Ostreococcus                     | ASV757  | 0.379  | 0.035 |
| Tryptophan-like C1 | Telonemia     | Telonemia-Group-2_X              | ASV792  | 0.493  | 0.005 |
| Tryptophan-like C1 | Alveolata     | Dino-Group-II_unclassified       | ASV808  | 0.361  | 0.046 |
| Tryptophan-like C1 | Chlorophyta   | Ostreococcus                     | ASV886  | 0.428  | 0.016 |
| Tryptophan-like C1 | Rhizaria      | Cercozoa_unclassified            | ASV1059 | 0.547  | 0.001 |
| Tryptophan-like C1 | Chlorophyta   | Ostreococcus                     | ASV1187 | 0.433  | 0.015 |
| Tryptophan-like C1 | Rhizaria      | Filosa-Thecofilosea_unclassified | ASV1524 | 0.419  | 0.019 |
| Tryptophan-like C1 | Chlorophyta   | Chloroparvula                    | ASV1850 | 0.438  | 0.014 |
| Tryptophan-like C1 | Alveolata     | Gyrodinium                       | ASV021  | -0.447 | 0.012 |
| Tryptophan-like C1 | Alveolata     | Gyrodinium                       | ASV063  | -0.385 | 0.033 |
| Tryptophan-like C1 | Alveolata     | Dino-Group-II-Clade-20_X         | ASV087  | -0.364 | 0.044 |
| Tryptophan-like C1 | Alveolata     | Lepidodinium                     | ASV211  | -0.367 | 0.043 |
| Tryptophan-like C1 | Alveolata     | Strombidiidae_X                  | ASV247  | -0.364 | 0.044 |
| Tryptophan-like C1 | Alveolata     | Oligotrichida_XX                 | ASV373  | -0.416 | 0.020 |
| Tryptophan-like C1 | Alveolata     | Scrippsiella                     | ASV898  | -0.355 | 0.050 |
| Humic-like C2      | Alveolata     | Dinophyceae_unclassified         | ASV030  | 0.394  | 0.028 |
| Humic-like C2      | Alveolata     | Dino-Group-II-Clade-5_X          | ASV093  | 0.433  | 0.015 |
| Humic-like C2      | Alveolata     | Dino-Group-II-Clade-1_X          | ASV106  | 0.399  | 0.026 |
| Humic-like C2      | Alveolata     | Karlodinium                      | ASV165  | 0.406  | 0.024 |
| Humic-like C2      | Alveolata     | Strombidiidae_X                  | ASV247  | 0.365  | 0.044 |
| Humic-like C2      | Stramenopiles | MAST-3E                          | ASV282  | 0.467  | 0.008 |
| Humic-like C2      | Chlorophyta   | Picochlorum                      | ASV456  | 0.370  | 0.041 |
| Humic-like C2      | Stramenopiles | Haliphthorales_unclassified      | ASV714  | 0.360  | 0.047 |
| Humic-like C2      | Alveolata     | Dinophyceae_unclassified         | ASV294  | -0.384 | 0.033 |

|                  |               |                                 |         |        |       |
|------------------|---------------|---------------------------------|---------|--------|-------|
| Humic-like C2    | Alveolata     | Dinophyceae_unclassified        | ASV1151 | -0.366 | 0.043 |
| Humic-like C2    | Alveolata     | Dinophyceae_unclassified        | ASV1355 | -0.388 | 0.031 |
| Humic-like C2    | Alveolata     | Dinophyceae_unclassified        | ASV1993 | -0.497 | 0.004 |
| Humic-like C3    | Alveolata     | Dinophyceae_unclassified        | ASV078  | 0.455  | 0.010 |
| Humic-like C3    | Alveolata     | Dino-Group-I-Clade-4_X          | ASV159  | 0.431  | 0.016 |
| Humic-like C3    | Alveolata     | Strombidiidae_X                 | ASV162  | 0.492  | 0.005 |
| Humic-like C3    | Alveolata     | Strombidiidae_X                 | ASV233  | 0.390  | 0.030 |
| Humic-like C3    | Alveolata     | Strombidiidae_X                 | ASV247  | 0.453  | 0.011 |
| Humic-like C3    | Alveolata     | Dino-Group-I-Clade-5_X          | ASV276  | 0.365  | 0.043 |
| Humic-like C3    | Stramenopiles | MAST-3E                         | ASV282  | 0.400  | 0.026 |
| Humic-like C3    | Alveolata     | Oligotrichida_XX                | ASV373  | 0.422  | 0.018 |
| Humic-like C3    | Alveolata     | Dino-Group-II-Clade-10-and-11_X | ASV524  | 0.440  | 0.013 |
| Humic-like C3    | Alveolata     | Strombidiidae_X                 | ASV682  | 0.397  | 0.027 |
| Humic-like C3    | Stramenopiles | Bacillariaceae_unclassified     | ASV887  | 0.425  | 0.017 |
| Humic-like C3    | Alveolata     | Scrippsiella                    | ASV898  | 0.375  | 0.038 |
| Humic-like C3    | Alveolata     | Gymnodinium                     | ASV309  | -0.420 | 0.019 |
| Humic-like C3    | Alveolata     | Dino-Group-II_unclassified      | ASV841  | -0.429 | 0.016 |
| Humic-like C3    | Alveolata     | Dinophyceae_XXX                 | ASV855  | -0.367 | 0.042 |
| Humic-like C3    | Alveolata     | Dino-Group-I-Clade-1_X          | ASV872  | -0.418 | 0.019 |
| Humic-like C3    | Alveolata     | Dinophyceae_unclassified        | ASV1151 | -0.415 | 0.020 |
| Humic-like C3    | Alveolata     | Dinophyceae_unclassified        | ASV1355 | -0.444 | 0.012 |
| Humic-like C3    | Alveolata     | Dinophyceae_unclassified        | ASV1993 | -0.528 | 0.002 |
| Tyrosine-like C4 | Alveolata     | Dino-Group-II-Clade-6_X         | ASV012  | 0.583  | 0.001 |
| Tyrosine-like C4 | Alveolata     | Dino-Group-I-Clade-5_X          | ASV025  | 0.562  | 0.001 |
| Tyrosine-like C4 | Alveolata     | Dinophyceae_unclassified        | ASV030  | 0.458  | 0.010 |
| Tyrosine-like C4 | Alveolata     | Dino-Group-I-Clade-1_X          | ASV032  | 0.506  | 0.004 |
| Tyrosine-like C4 | Alveolata     | Dino-Group-II-Clade-6_X         | ASV039  | 0.564  | 0.001 |
| Tyrosine-like C4 | Chlorophyta   | Chloropicon                     | ASV045  | 0.607  | 0.000 |
| Tyrosine-like C4 | Alveolata     | Dino-Group-I-Clade-1_X          | ASV050  | 0.440  | 0.013 |
| Tyrosine-like C4 | Alveolata     | Dino-Group-I-Clade-5_X          | ASV067  | 0.415  | 0.020 |

|                  |                    |                                 |        |       |       |
|------------------|--------------------|---------------------------------|--------|-------|-------|
| Tyrosine-like C4 | Alveolata          | Lepidodinium                    | ASV071 | 0.377 | 0.036 |
| Tyrosine-like C4 | Alveolata          | Dino-Group-I-Clade-1_X          | ASV072 | 0.574 | 0.001 |
| Tyrosine-like C4 | Alveolata          | Dino-Group-III_XX               | ASV100 | 0.476 | 0.007 |
| Tyrosine-like C4 | Alveolata          | Pelagodinium                    | ASV120 | 0.361 | 0.046 |
| Tyrosine-like C4 | Alveolata          | Dino-Group-II-Clade-17_X        | ASV140 | 0.440 | 0.013 |
| Tyrosine-like C4 | Alveolata          | Dino-Group-I-Clade-1_X          | ASV149 | 0.561 | 0.001 |
| Tyrosine-like C4 | Alveolata          | Dino-Group-II-Clade-10-and-11_X | ASV166 | 0.573 | 0.001 |
| Tyrosine-like C4 | Stramenopiles      | MAST-3F                         | ASV169 | 0.570 | 0.001 |
| Tyrosine-like C4 | Alveolata          | Dino-Group-I-Clade-5_X          | ASV173 | 0.383 | 0.033 |
| Tyrosine-like C4 | Alveolata          | Dino-Group-I-Clade-5_X          | ASV180 | 0.478 | 0.007 |
| Tyrosine-like C4 | Alveolata          | Dino-Group-V_XX                 | ASV184 | 0.363 | 0.045 |
| Tyrosine-like C4 | Alveolata          | Dino-Group-I-Clade-1_X          | ASV210 | 0.365 | 0.043 |
| Tyrosine-like C4 | Alveolata          | Dino-Group-II-Clade-10-and-11_X | ASV219 | 0.591 | 0.000 |
| Tyrosine-like C4 | Alveolata          | Dino-Group-II-Clade-8_X         | ASV226 | 0.510 | 0.003 |
| Tyrosine-like C4 | Alveolata          | Dino-Group-II_XX                | ASV241 | 0.431 | 0.015 |
| Tyrosine-like C4 | Alveolata          | Dinophyceae_XXX                 | ASV254 | 0.364 | 0.044 |
| Tyrosine-like C4 | Stramenopiles      | Chrysophyceae_Clade-EC2I_XX     | ASV320 | 0.361 | 0.046 |
| Tyrosine-like C4 | Rhizaria           | Amphibelone                     | ASV328 | 0.433 | 0.015 |
| Tyrosine-like C4 | Alveolata          | Dino-Group-I-Clade-5_X          | ASV342 | 0.386 | 0.032 |
| Tyrosine-like C4 | Stramenopiles      | MAST-1B                         | ASV450 | 0.515 | 0.003 |
| Tyrosine-like C4 | Stramenopiles      | MOCH-5_XXX                      | ASV468 | 0.404 | 0.024 |
| Tyrosine-like C4 | Alveolata          | Dino-Group-II-Clade-5_X         | ASV477 | 0.380 | 0.035 |
| Tyrosine-like C4 | Kathablepharidacea | Kathablepharidida_XX            | ASV485 | 0.377 | 0.037 |
| Tyrosine-like C4 | Alveolata          | Dino-Group-I-Clade-1_X          | ASV531 | 0.451 | 0.011 |
| Tyrosine-like C4 | Alveolata          | Tontoniidae_unclassified        | ASV550 | 0.381 | 0.034 |
| Tyrosine-like C4 | Stramenopiles      | Dictyochophyceae_X_unclassified | ASV657 | 0.529 | 0.002 |
| Tyrosine-like C4 | Chlorophyta        | Chloroparvula                   | ASV707 | 0.529 | 0.002 |
| Tyrosine-like C4 | Telonemia          | Telonemia-Group-2_X             | ASV709 | 0.359 | 0.047 |
| Tyrosine-like C4 | Stramenopiles      | Gyrista_unclassified            | ASV747 | 0.394 | 0.028 |
| Tyrosine-like C4 | Alveolata          | Dino-Group-II-Clade-10-and-11_X | ASV753 | 0.388 | 0.031 |

|                  |                    |                                  |         |        |       |
|------------------|--------------------|----------------------------------|---------|--------|-------|
| Tyrosine-like C4 | Stramenopiles      | MAST-3A                          | ASV922  | 0.465  | 0.008 |
| Tyrosine-like C4 | Alveolata          | Dino-Group-II_unclassified       | ASV1107 | 0.403  | 0.025 |
| Tyrosine-like C4 | Rhizaria           | Filosa-Thecofilosea_unclassified | ASV1524 | 0.431  | 0.016 |
| Tyrosine-like C4 | Chlorophyta        | Chloroparvula                    | ASV1850 | 0.494  | 0.005 |
| Tyrosine-like C4 | Alveolata          | Apicomplexa_XXXX                 | ASV2893 | 0.418  | 0.019 |
| Tyrosine-like C4 | Alveolata          | Gyrodinium                       | ASV003  | -0.476 | 0.007 |
| Tyrosine-like C4 | Stramenopiles      | Leptocylindrus                   | ASV010  | -0.455 | 0.010 |
| Tyrosine-like C4 | Alveolata          | Gymnodinium                      | ASV037  | -0.442 | 0.013 |
| Tyrosine-like C4 | Alveolata          | Dinophyceae_unclassified         | ASV040  | -0.498 | 0.004 |
| Tyrosine-like C4 | Alveolata          | Dino-Group-II-Clade-6_X          | ASV055  | -0.517 | 0.003 |
| Tyrosine-like C4 | Stramenopiles      | Guinardia                        | ASV065  | -0.453 | 0.011 |
| Tyrosine-like C4 | Alveolata          | Strombidiidae_X                  | ASV097  | -0.527 | 0.002 |
| Tyrosine-like C4 | Chlorophyta        | Picochlorum                      | ASV101  | -0.445 | 0.012 |
| Tyrosine-like C4 | Alveolata          | Dino-Group-II-Clade-6_X          | ASV113  | -0.394 | 0.029 |
| Tyrosine-like C4 | Alveolata          | Dinophyceae_unclassified         | ASV116  | -0.394 | 0.028 |
| Tyrosine-like C4 | Chlorophyta        | Chlorellales_X_unclassified      | ASV117  | -0.435 | 0.015 |
| Tyrosine-like C4 | Stramenopiles      | Cyclotella                       | ASV121  | -0.491 | 0.005 |
| Tyrosine-like C4 | Stramenopiles      | Thalassiosiraceae_unclassified   | ASV127  | -0.477 | 0.007 |
| Tyrosine-like C4 | Alveolata          | Pseudotontonia                   | ASV147  | -0.458 | 0.010 |
| Tyrosine-like C4 | Alveolata          | Gonyaulax                        | ASV148  | -0.388 | 0.031 |
| Tyrosine-like C4 | Chlorophyta        | Picochlorum                      | ASV154  | -0.372 | 0.039 |
| Tyrosine-like C4 | Stramenopiles      | Minutocellus                     | ASV161  | -0.450 | 0.011 |
| Tyrosine-like C4 | Alveolata          | Dino-Group-I-Clade-4_X           | ASV198  | -0.462 | 0.009 |
| Tyrosine-like C4 | Stramenopiles      | Cyclotella                       | ASV234  | -0.477 | 0.007 |
| Tyrosine-like C4 | Alveolata          | Pelagostrobilidium               | ASV246  | -0.455 | 0.010 |
| Tyrosine-like C4 | Stramenopiles      | Skeletonema                      | ASV259  | -0.414 | 0.021 |
| Tyrosine-like C4 | Rhizaria           | Ebria                            | ASV267  | -0.431 | 0.016 |
| Tyrosine-like C4 | Alveolata          | Dino-Group-II-Clade-13_X         | ASV295  | -0.477 | 0.007 |
| Tyrosine-like C4 | Stramenopiles      | Leptocylindrus                   | ASV307  | -0.498 | 0.004 |
| Tyrosine-like C4 | Kathablepharidacea | Kathablepharidida_XX             | ASV310  | -0.416 | 0.020 |

|                  |               |                                 |         |        |       |
|------------------|---------------|---------------------------------|---------|--------|-------|
| Tyrosine-like C4 | Alveolata     | Dinophyceae_unclassified        | ASV346  | -0.550 | 0.001 |
| Tyrosine-like C4 | Alveolata     | Dino-Group-I-Clade-5_X          | ASV366  | -0.479 | 0.006 |
| Tyrosine-like C4 | Alveolata     | Dadayiella                      | ASV392  | -0.369 | 0.041 |
| Tyrosine-like C4 | Alveolata     | Dino-Group-II-Clade-10-and-11_X | ASV430  | -0.378 | 0.036 |
| Tyrosine-like C4 | Alveolata     | Dinophyceae_unclassified        | ASV471  | -0.381 | 0.034 |
| Tyrosine-like C4 | Chlorophyta   | Crustomastigaceae_unclassified  | ASV476  | -0.381 | 0.034 |
| Tyrosine-like C4 | Rhizaria      | Cercozoa_unclassified           | ASV509  | -0.520 | 0.003 |
| Tyrosine-like C4 | Rhodophyta    | Porphyridiales_X_unclassified   | ASV519  | -0.504 | 0.004 |
| Tyrosine-like C4 | Cryptophyta   | Baffinella                      | ASV545  | -0.382 | 0.034 |
| Tyrosine-like C4 | Alveolata     | Karodinium                      | ASV559  | -0.380 | 0.035 |
| Tyrosine-like C4 | Alveolata     | Strombidiidae_unclassified      | ASV606  | -0.463 | 0.009 |
| Tyrosine-like C4 | Stramenopiles | MAST-6_X                        | ASV650  | -0.474 | 0.007 |
| Tyrosine-like C4 | Cryptophyta   | Teleaulax                       | ASV684  | -0.386 | 0.032 |
| Tyrosine-like C4 | Chlorophyta   | Picochlorum                     | ASV735  | -0.403 | 0.024 |
| Tyrosine-like C4 | Stramenopiles | Mediolabrus                     | ASV781  | -0.378 | 0.036 |
| Tyrosine-like C4 | Alveolata     | Gonyaulax                       | ASV822  | -0.410 | 0.022 |
| Tyrosine-like C4 | Stramenopiles | Chaetoceros                     | ASV873  | -0.434 | 0.015 |
| Tyrosine-like C4 | Alveolata     | Strombidiidae_X                 | ASV900  | -0.471 | 0.007 |
| Tyrosine-like C4 | Alveolata     | Spirotrichea_unclassified       | ASV959  | -0.429 | 0.016 |
| Tyrosine-like C4 | Chlorophyta   | Marsupiomonas                   | ASV970  | -0.431 | 0.015 |
| Tyrosine-like C4 | Alveolata     | Gonyaulacales_unclassified      | ASV1118 | -0.440 | 0.013 |
| Tyrosine-like C4 | Chlorophyta   | Chlorellales_X_unclassified     | ASV1313 | -0.474 | 0.007 |
| Tyrosine-like C4 | Cryptophyta   | Plagioselmis                    | ASV1640 | -0.445 | 0.012 |
| Tyrosine-like C4 | Alveolata     | Heterotrichea_XXX               | ASV1902 | -0.431 | 0.015 |
| Surfactant       | Chlorophyta   | Bathycoccus                     | ASV008  | 0.450  | 0.018 |
| Surfactant       | Alveolata     | Dinophyceae_unclassified        | ASV011  | 0.522  | 0.005 |
| Surfactant       | Stramenopiles | Minidiscus                      | ASV017  | 0.396  | 0.041 |
| Surfactant       | Chlorophyta   | Micromonas                      | ASV023  | 0.426  | 0.027 |
| Surfactant       | Alveolata     | Prorocentrum                    | ASV029  | 0.437  | 0.023 |
| Surfactant       | Chlorophyta   | Micromonas                      | ASV036  | 0.628  | 0.000 |
| Surfactant       | Alveolata     | Dino-Group-II-Clade-14_X        | ASV038  | 0.443  | 0.021 |
| Surfactant       | Stramenopiles | Pelagomonadales_clade_B1        | ASV041  | 0.619  | 0.001 |

|            |               |                            |         |       |       |
|------------|---------------|----------------------------|---------|-------|-------|
| Surfactant | Stramenopiles | Aureococcus                | ASV042  | 0.582 | 0.001 |
| Surfactant | Chlorophyta   | Pseudosourfieldia          | ASV084  | 0.417 | 0.030 |
| Surfactant | Cryptophyta   | Teleaulax                  | ASV091  | 0.621 | 0.001 |
| Surfactant | Stramenopiles | MAST-3F                    | ASV169  | 0.387 | 0.046 |
| Surfactant | Cryptophyta   | Teleaulax                  | ASV171  | 0.393 | 0.042 |
| Surfactant | Alveolata     | Dinophyceae_unclassified   | ASV182  | 0.497 | 0.008 |
| Surfactant | Alveolata     | Dino-Group-V_XX            | ASV184  | 0.421 | 0.029 |
| Surfactant | Chlorophyta   | Micromonas                 | ASV199  | 0.654 | 0.000 |
| Surfactant | Alveolata     | Dino-Group-II-Clade-1_X    | ASV200  | 0.621 | 0.001 |
| Surfactant | Alveolata     | Dino-Group-II-Clade-7_X    | ASV212  | 0.649 | 0.000 |
| Surfactant | Stramenopiles | MAST-7B                    | ASV237  | 0.457 | 0.016 |
| Surfactant | Alveolata     | Dino-Group-I-Clade-1_X     | ASV253  | 0.591 | 0.001 |
| Surfactant | Alveolata     | Dinophyceae_unclassified   | ASV294  | 0.423 | 0.028 |
| Surfactant | Alveolata     | Dino-Group-II-Clade-1_X    | ASV306  | 0.598 | 0.001 |
| Surfactant | Stramenopiles | MAST-3A                    | ASV428  | 0.448 | 0.019 |
| Surfactant | Alveolata     | Dino-Group-III_XX          | ASV505  | 0.437 | 0.023 |
| Surfactant | Alveolata     | Dinophyceae_unclassified   | ASV511  | 0.690 | 0.000 |
| Surfactant | Alveolata     | Dino-Group-I-Clade-1_X     | ASV531  | 0.426 | 0.027 |
| Surfactant | Alveolata     | Dino-Group-II-Clade-4_X    | ASV569  | 0.436 | 0.023 |
| Surfactant | Stramenopiles | MAST-4B                    | ASV574  | 0.547 | 0.003 |
| Surfactant | Telonemia     | Telonemia-Group-2_X        | ASV610  | 0.470 | 0.013 |
| Surfactant | Stramenopiles | Parmales_env_3A            | ASV612  | 0.426 | 0.027 |
| Surfactant | Alveolata     | Prorocentrum               | ASV664  | 0.471 | 0.013 |
| Surfactant | Chlorophyta   | Picochlorum                | ASV719  | 0.386 | 0.047 |
| Surfactant | Stramenopiles | Triparma                   | ASV798  | 0.460 | 0.016 |
| Surfactant | Alveolata     | Dino-Group-II_unclassified | ASV808  | 0.425 | 0.027 |
| Surfactant | Chlorophyta   | Ostreococcus               | ASV886  | 0.470 | 0.013 |
| Surfactant | Alveolata     | Dino-Group-II_unclassified | ASV968  | 0.460 | 0.016 |
| Surfactant | Rhizaria      | Cercozoa_unclassified      | ASV1059 | 0.546 | 0.003 |
| Surfactant | Stramenopiles | MOCH-2_XXX                 | ASV1906 | 0.391 | 0.044 |
| Surfactant | Alveolata     | Apicomplexa_XXXX           | ASV2893 | 0.391 | 0.044 |

## References

- Cawley, K. M., Ding, Y., Fourqurean, J., and Jaffé, R.: Characterising the sources and fate of dissolved organic matter in Shark Bay, Australia: a preliminary study using optical properties and stable carbon isotopes, *Marine & Freshwater Research*, 63, 1098-1107, 10.1071/mf12028, 2012b.
- Cawley, K. M., Butler, K. D., Aiken, G. R., Larsen, L. G., Huntington, T. G., and McKnight, D. M.: Identifying fluorescent pulp mill effluent in the Gulf of Maine and its watershed, *Marine Pollution Bulletin*, 64, 1678-1687, <https://doi.org/10.1016/j.marpolbul.2012.05.040>, 2012a.
- Chen, M., Jung, J., Lee, Y. K., and Hur, J.: Surface accumulation of low molecular weight dissolved organic matter in surface waters and horizontal off-shelf spreading of nutrients and humic-like fluorescence in the Chukchi Sea of the Arctic Ocean, *Science of The Total Environment*, 639, 624-632, <https://doi.org/10.1016/j.scitotenv.2018.05.205>, 2018.
- Chen, M., Kim, S.-H., Jung, H.-J., Hyun, J.-H., Choi, J. H., Lee, H.-J., Huh, I.-A., and Hur, J.: Dynamics of dissolved organic matter in riverine sediments affected by weir impoundments: Production, benthic flux, and environmental implications, *Water Research*, 121, 150-161, <https://doi.org/10.1016/j.watres.2017.05.022>, 2017.
- Dainard, P. G. and Guéguen, C.: Distribution of PARAFAC modeled CDOM components in the North Pacific Ocean, Bering, Chukchi and Beaufort Seas, *Marine Chemistry*, 157, 216-223, <https://doi.org/10.1016/j.marchem.2013.10.007>, 2013.
- Devresse, Q., Becker, K. W., Dilmahamod, A. F., Ortega-Retuerta, E., and Engel, A.: Dissolved Organic Matter Fluorescence as a Tracer of Upwelling and Microbial Activities in Two Cyclonic Eddies in the Eastern Tropical North Atlantic, *Journal of Geophysical Research: Oceans*, 128, e2023JC019821, <https://doi.org/10.1029/2023JC019821>, 2023.
- Gao, Z. and Guéguen, C.: Size distribution of absorbing and fluorescing DOM in Beaufort Sea, Canada Basin, *Deep Sea Research Part I: Oceanographic Research Papers*, 121, 30-37, <https://doi.org/10.1016/j.dsr.2016.12.014>, 2017.
- Jeon, M. H., Jung, J., Park, M. O., Aoki, S., Kim, T.-W., and Kim, S.-K.: Tracing Circumpolar Deep Water and glacial meltwater using humic-like fluorescent dissolved organic matter in the Amundsen Sea, Antarctica, *Marine Chemistry*, 235, 104008, <https://doi.org/10.1016/j.marchem.2021.104008>, 2021.
- Lu, K., Gao, H., Yu, H., Liu, D., Zhu, N., and Wan, K.: Insight into variations of DOM fractions in different latitudinal rural black-odor waterbodies of eastern China using fluorescence spectroscopy coupled with structure equation model, *Science of The Total Environment*, 816, 151531, <https://doi.org/10.1016/j.scitotenv.2021.151531>, 2022.
- Philibert, M., Luo, S., Moussanas, L., Yuan, Q., Filloux, E., Zraick, F., and Murphy, K. R.: Drinking water aromaticity and treatability is predicted by dissolved organic matter fluorescence, *Water Research*, 220, 118592, <https://doi.org/10.1016/j.watres.2022.118592>, 2022.
- Tanaka, K., Kuma, K., Hamasaki, K., and Yamashita, Y.: Accumulation of humic-like fluorescent dissolved organic matter in the Japan Sea, *Scientific Reports*, 4, 5292, 10.1038/srep05292, 2014.
- Yamashita, Y., Panton, A., Mahaffey, C., and Jaffé, R.: Assessing the spatial and temporal variability of dissolved organic matter in Liverpool Bay using excitation–emission matrix fluorescence and parallel factor analysis, *Ocean Dynamics*, 61, 569-579, 10.1007/s10236-010-0365-4, 2011.
